# Supplementary material for: Ru(ii)-Catalyzed cascade decarbonylative annulation and dehydrogenative alkenylation reactions: synthesis of phthalides
Source: Royal Society of Chemistry journal article supplement (doi:10.1039/d1ob00019e), 2021-01-01
Supplement: d1ob00019e1.pdf [file d1ob00019e1.pdf]

## **Supporting Information**

### **Ru(II)-Catalyzed Cascade Decarbonylative Annulation and Dehydrogenative Alkenylation**

#### **Reactions: Synthesis of Phthalides**

Swagata Baruah, Sabera Sultana, Pratiksha Bhorali, Pallabi Saikia and Sanjib Gogoi\*

Applied Organic Chemistry, Chemical Sciences & Technology Division, CSIR-North East

Institute of Science and Technology, Jorhat 785006, AcSIR, Ghaziabad-201002, India

E-mail: skgogoi1@gmail.com; sanjibgogoi@neist.res.in

**$^1\text{H}$  and  $^{13}\text{C}$  of Compound 3aa (500 & 125 MHz,  $\text{CDCl}_3$ ):**

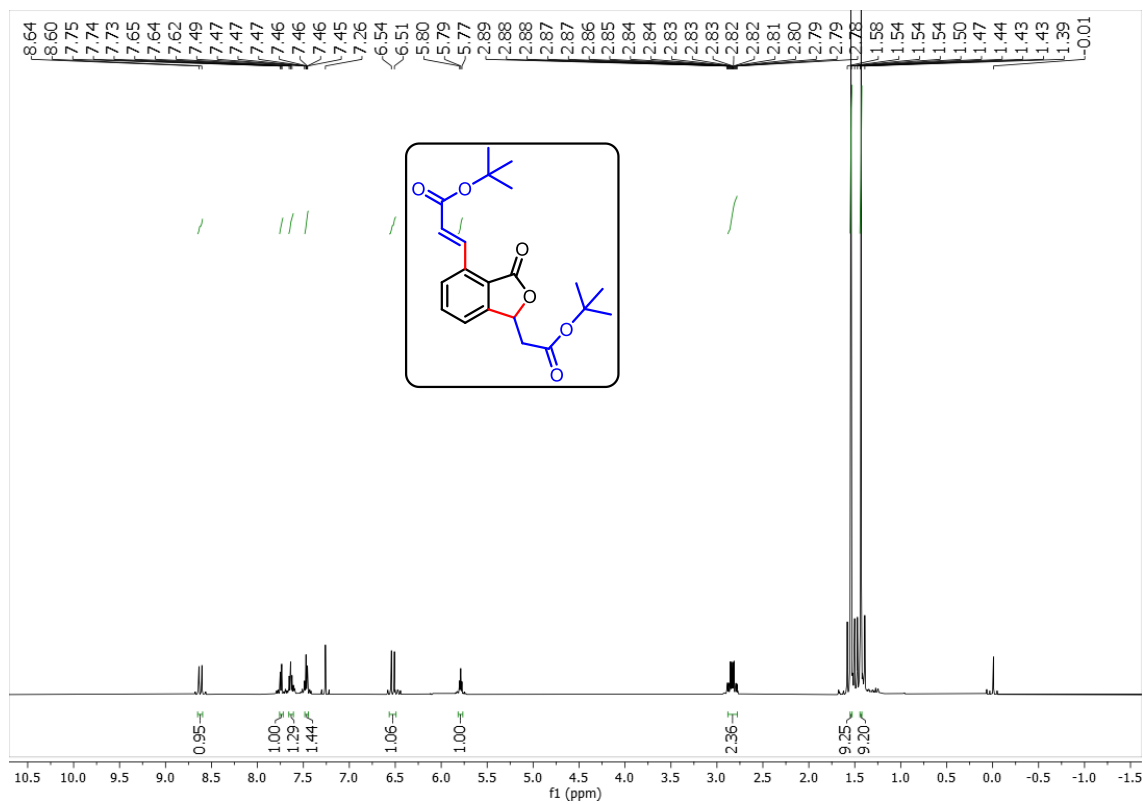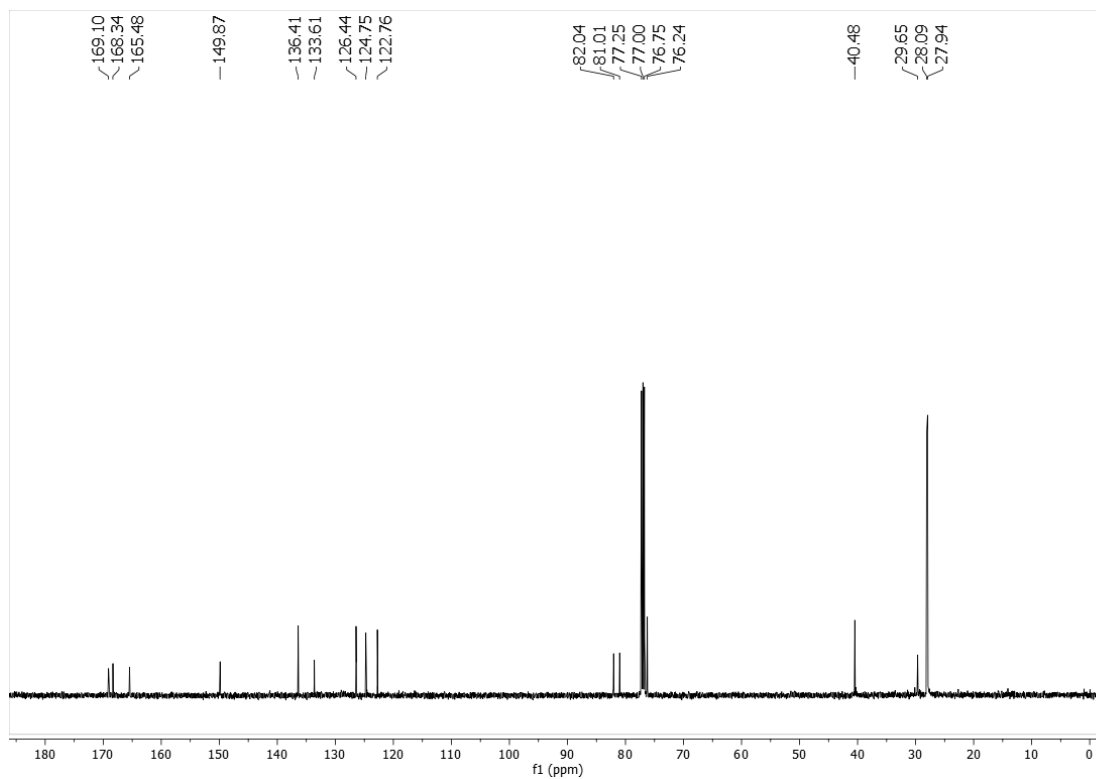

**$^1\text{H}$  and  $^{13}\text{C}$  of Compound 3ba (500 & 125 MHz,  $\text{CDCl}_3$ ):**

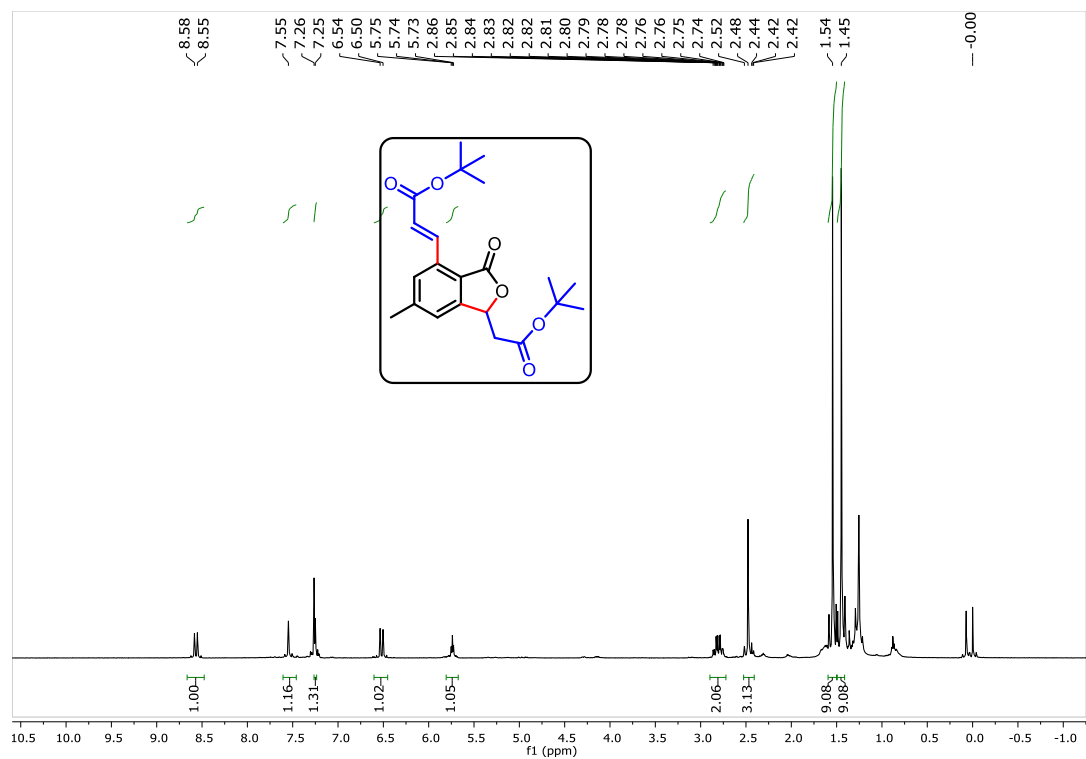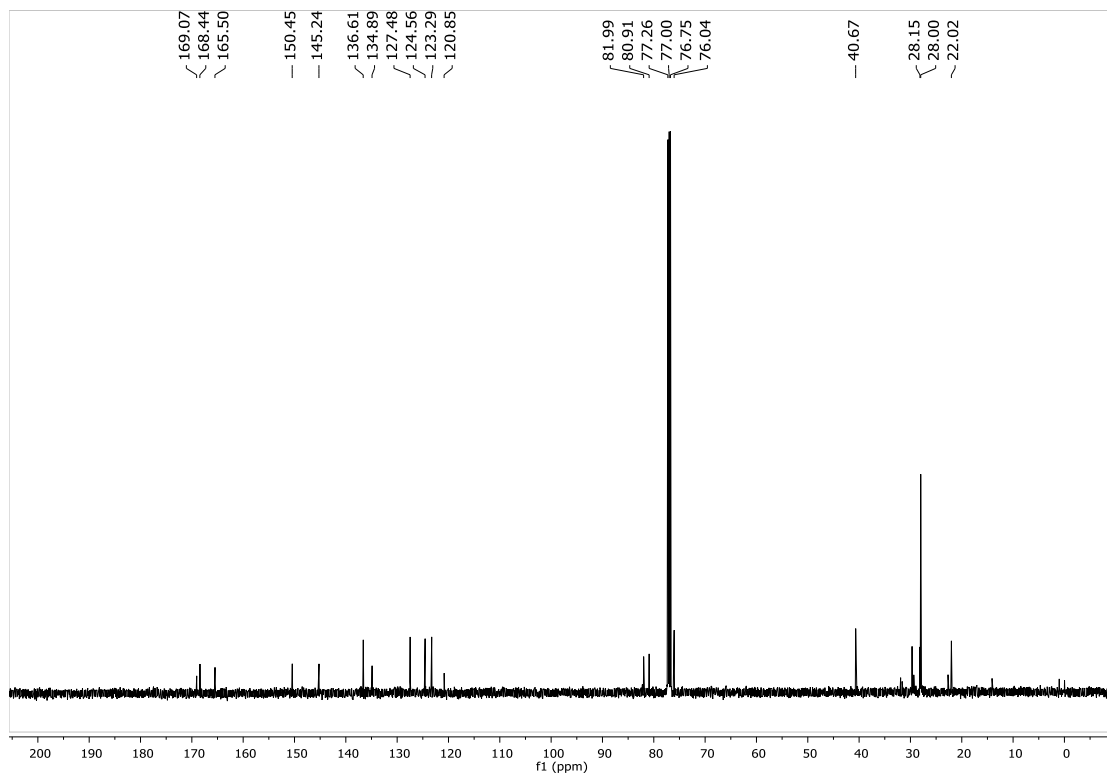

**$^1\text{H}$  and  $^{13}\text{C}$  of Compound 3ca (500 & 125 MHz,  $\text{CDCl}_3$ ):**

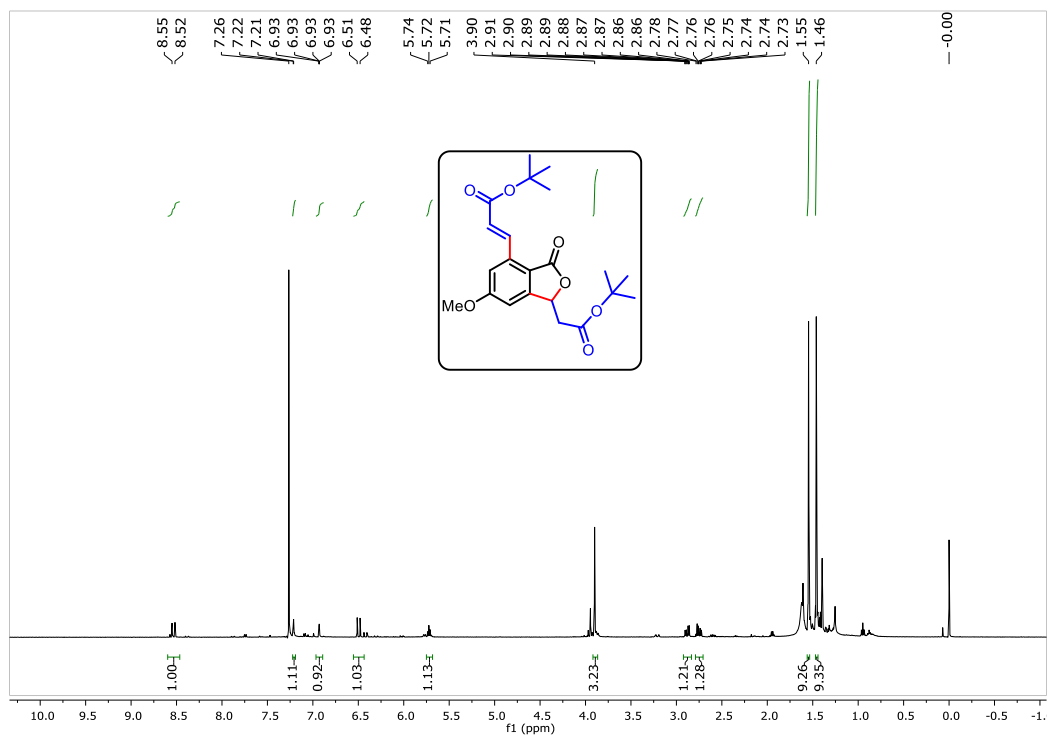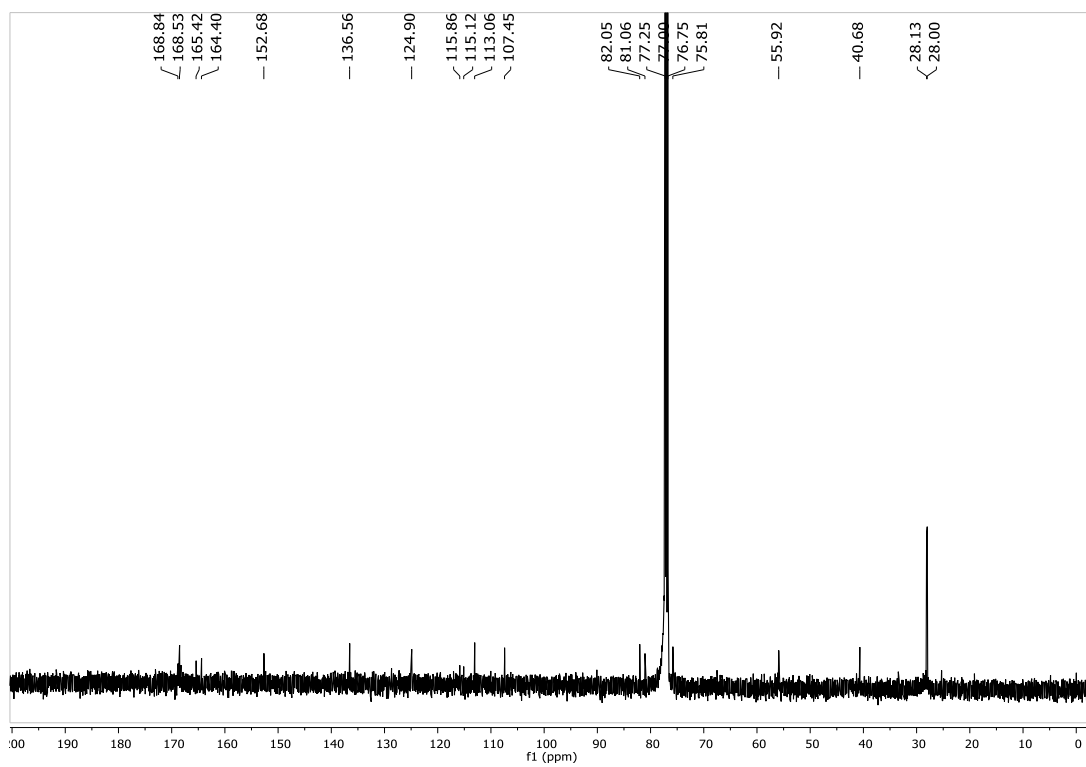

**$^1\text{H}$  and  $^{13}\text{C}$  of Compound 3da (500 & 125 MHz,  $\text{CDCl}_3$ ):**

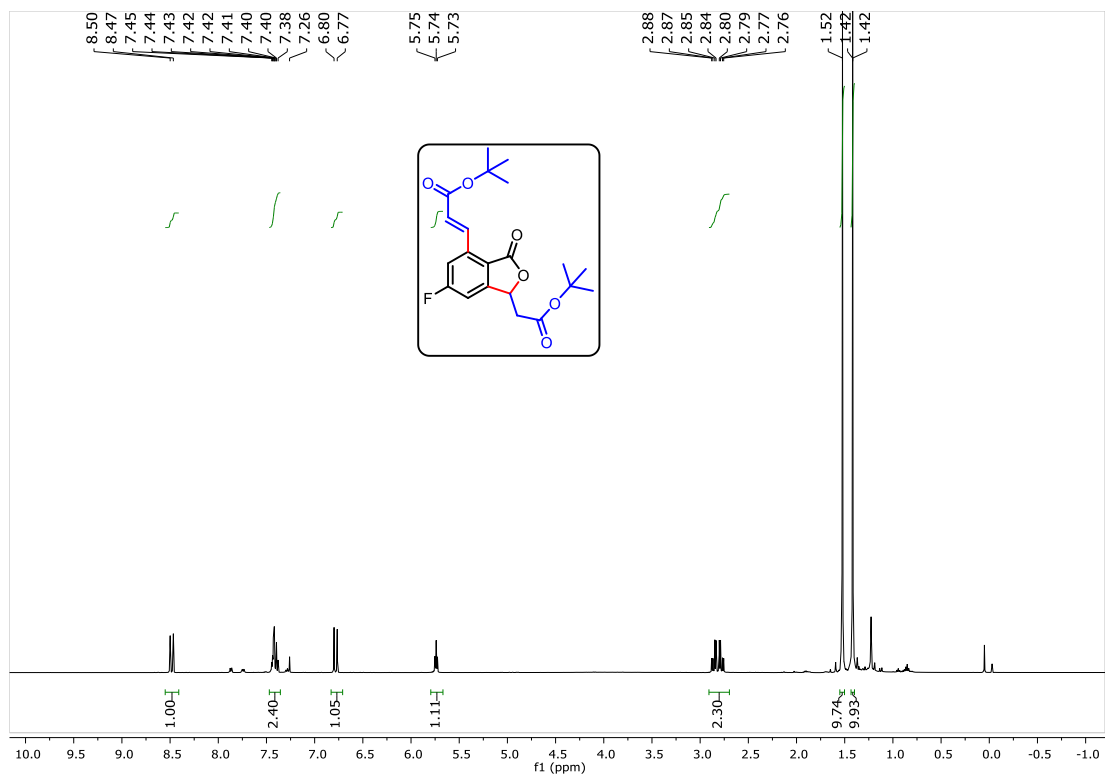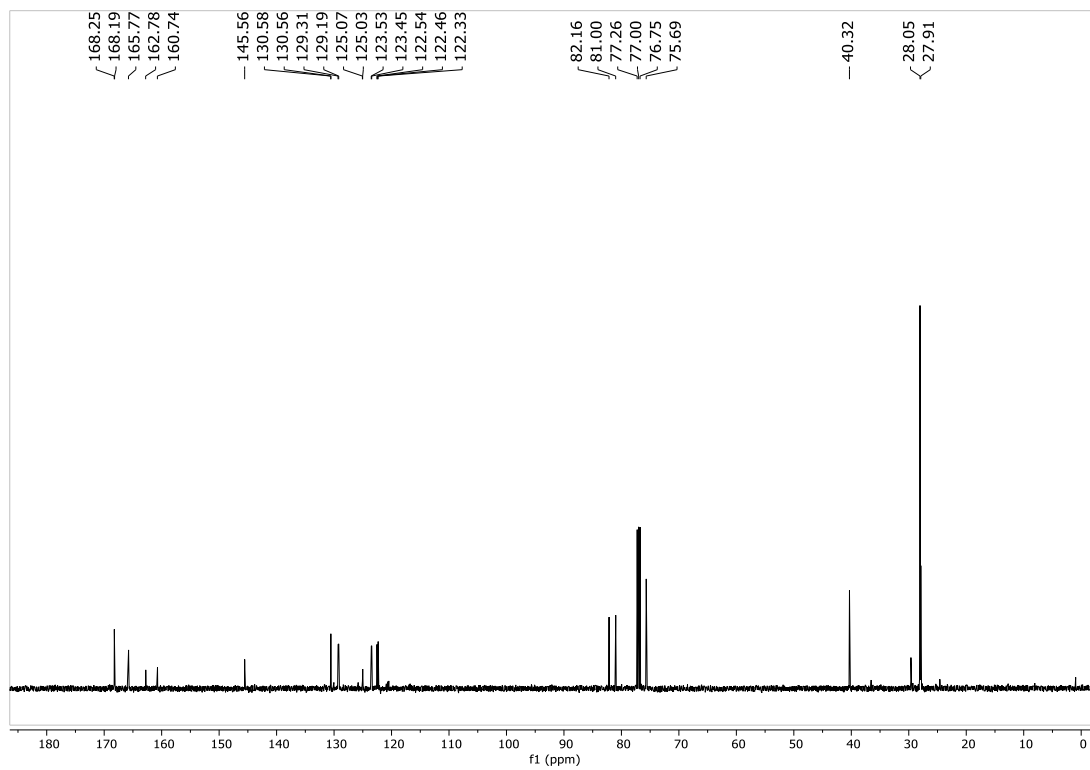

**$^1\text{H}$  and  $^{13}\text{C}$  of Compound 3ea (500 & 125 MHz,  $\text{CDCl}_3$ ):**

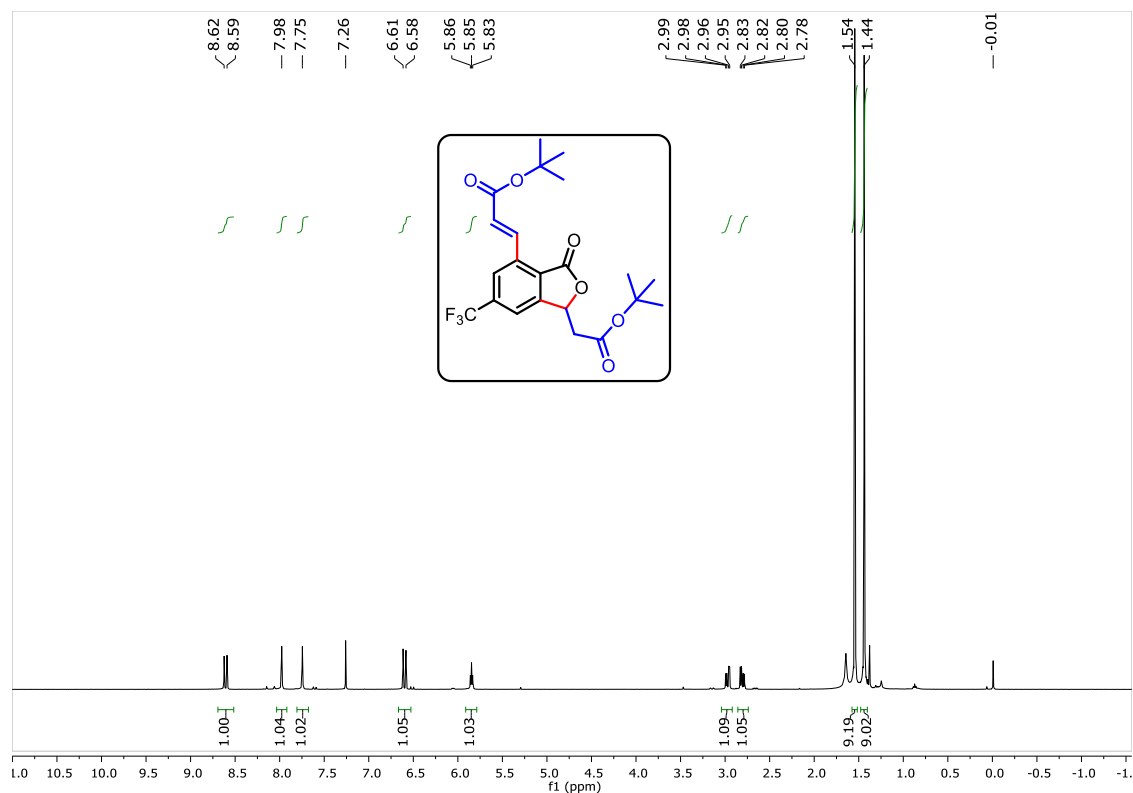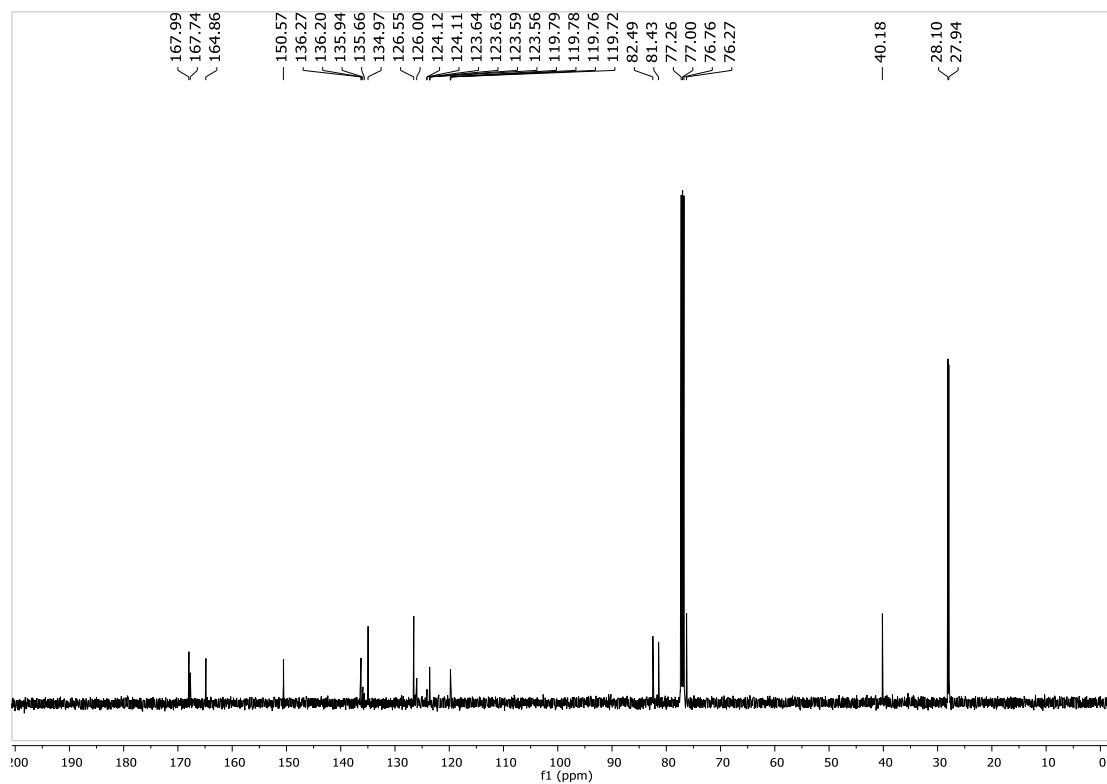

**$^1\text{H}$  and  $^{13}\text{C}$  of Compound 3fa (500 & 125 MHz,  $\text{CDCl}_3$ ):**

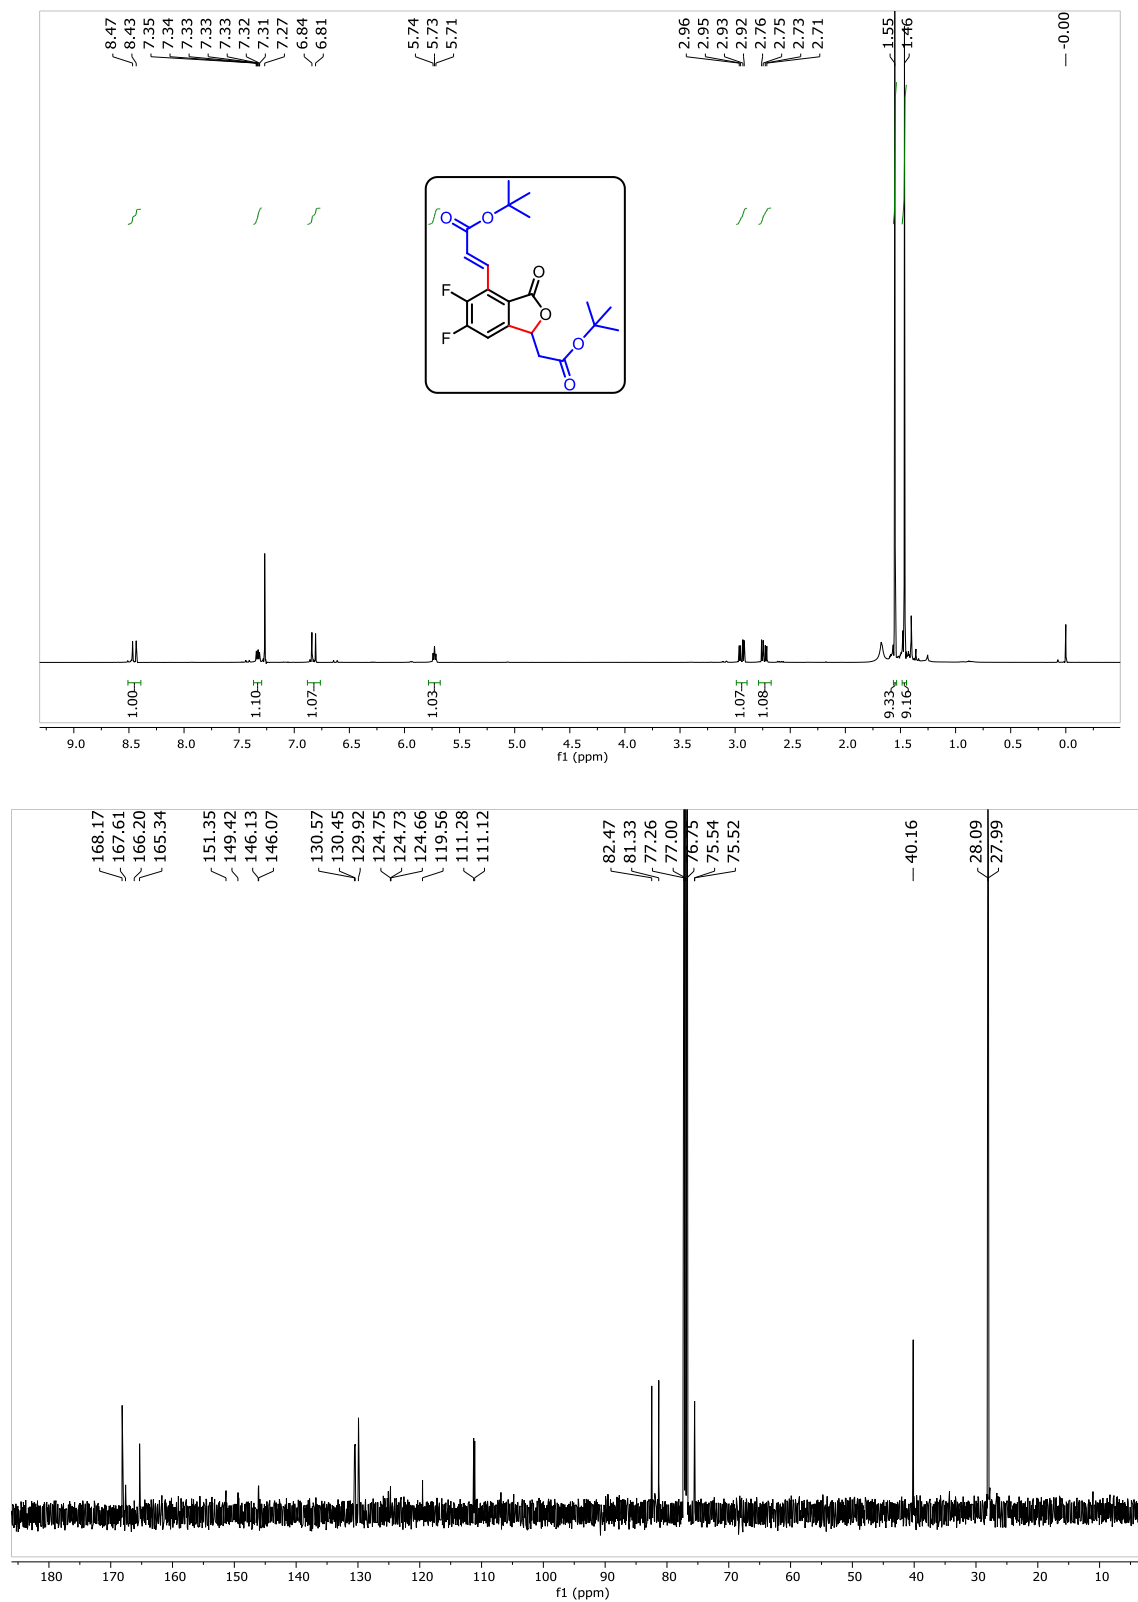

**$^1\text{H}$  and  $^{13}\text{C}$  of Compound 3ab (500 & 125 MHz,  $\text{CDCl}_3$ ):**

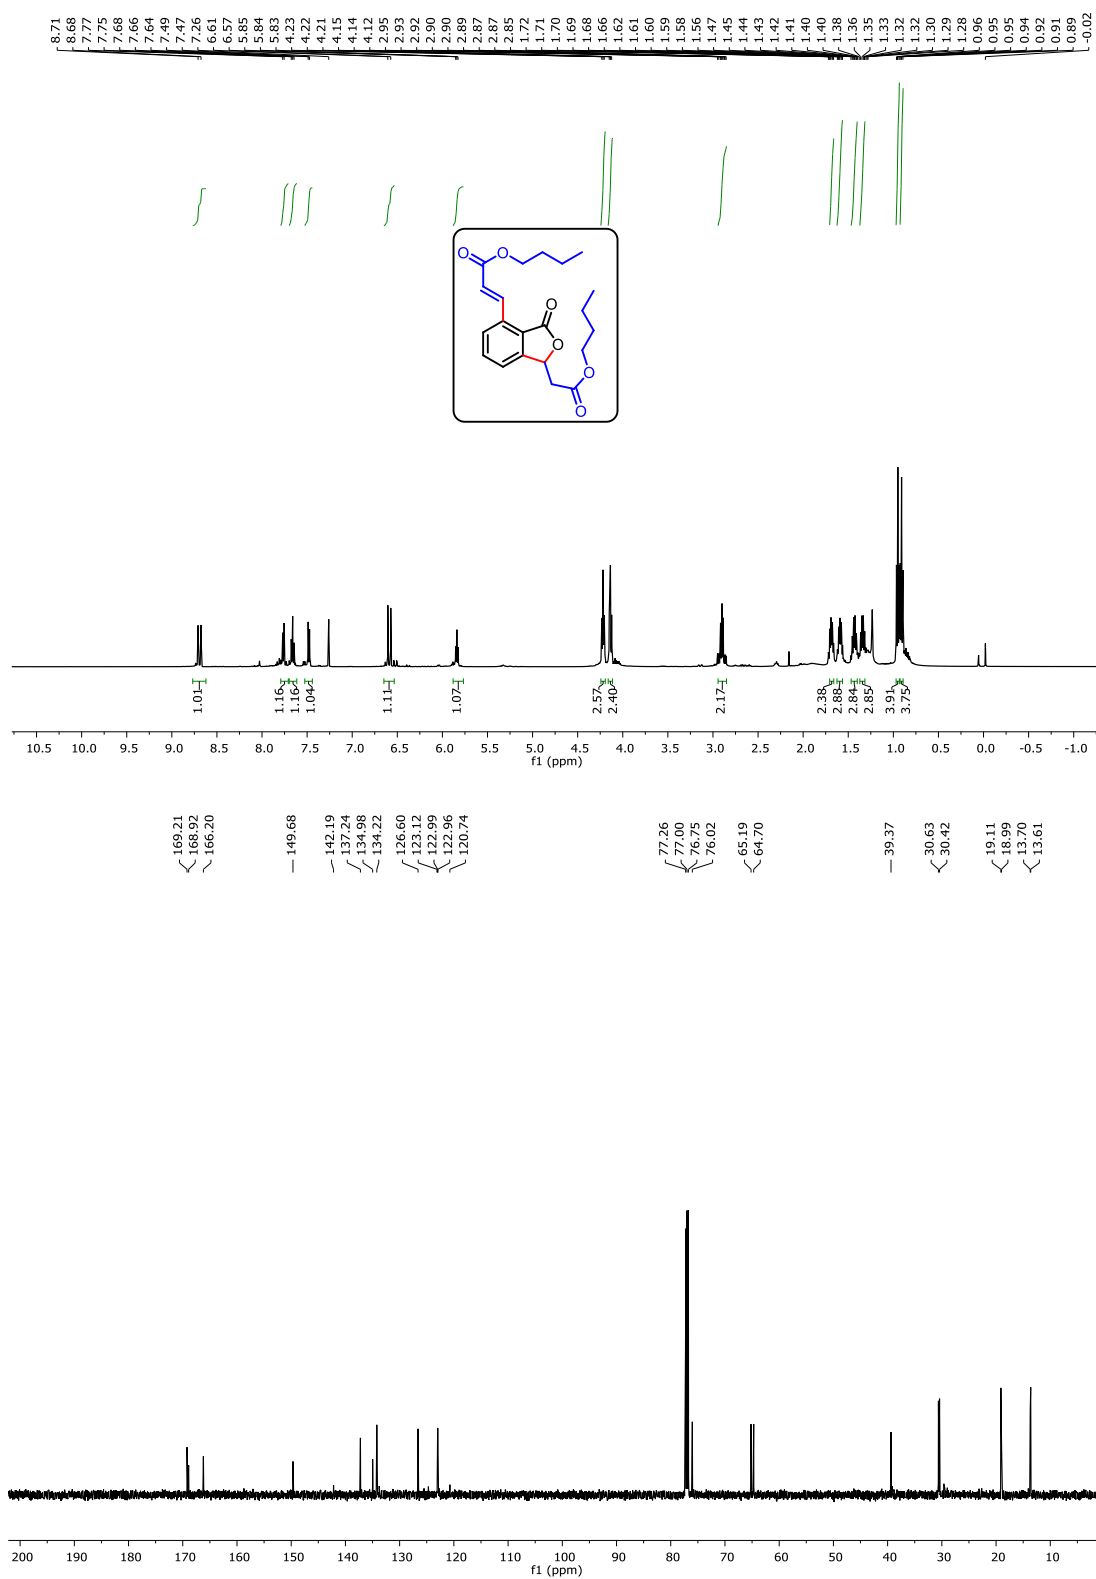



**$^1\text{H}$  and  $^{13}\text{C}$  of Compound 3bb (500 & 125 MHz,  $\text{CDCl}_3$ ):**

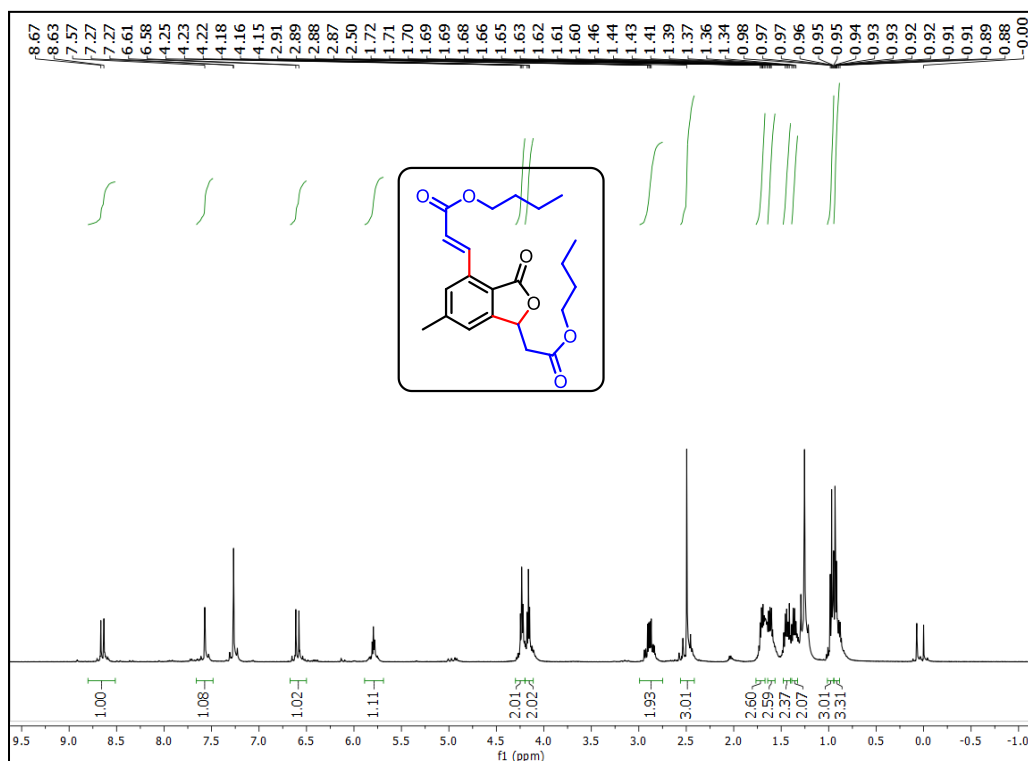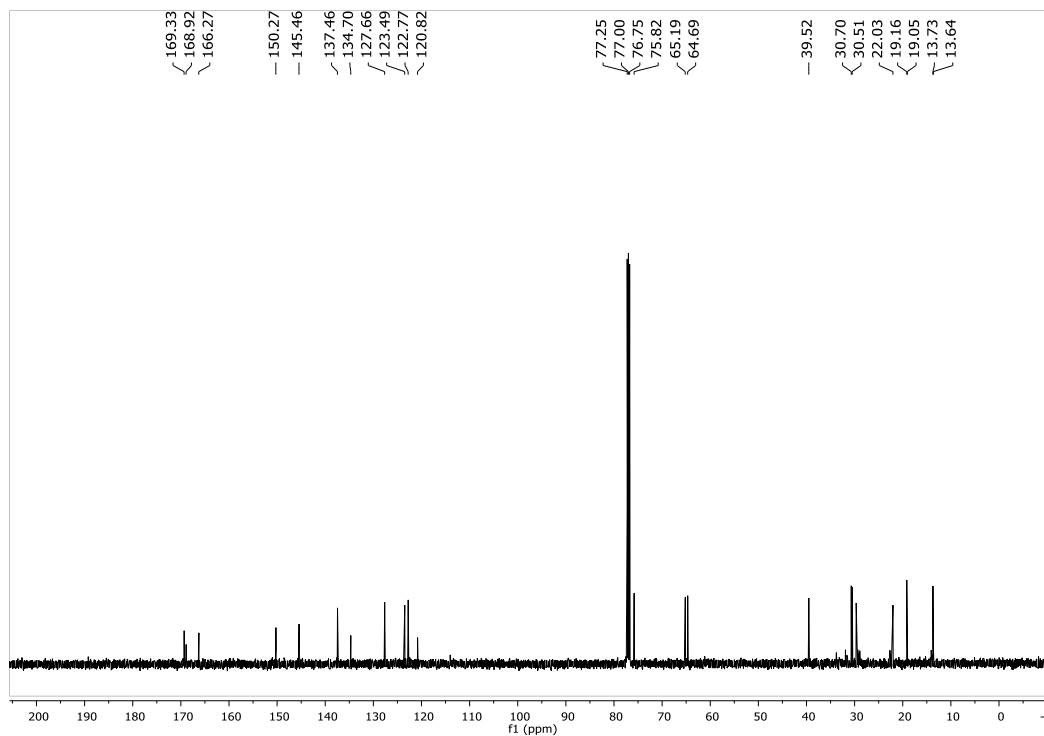

**$^1\text{H}$  and  $^{13}\text{C}$  of Compound 3db (500 & 125 MHz,  $\text{CDCl}_3$ ):**

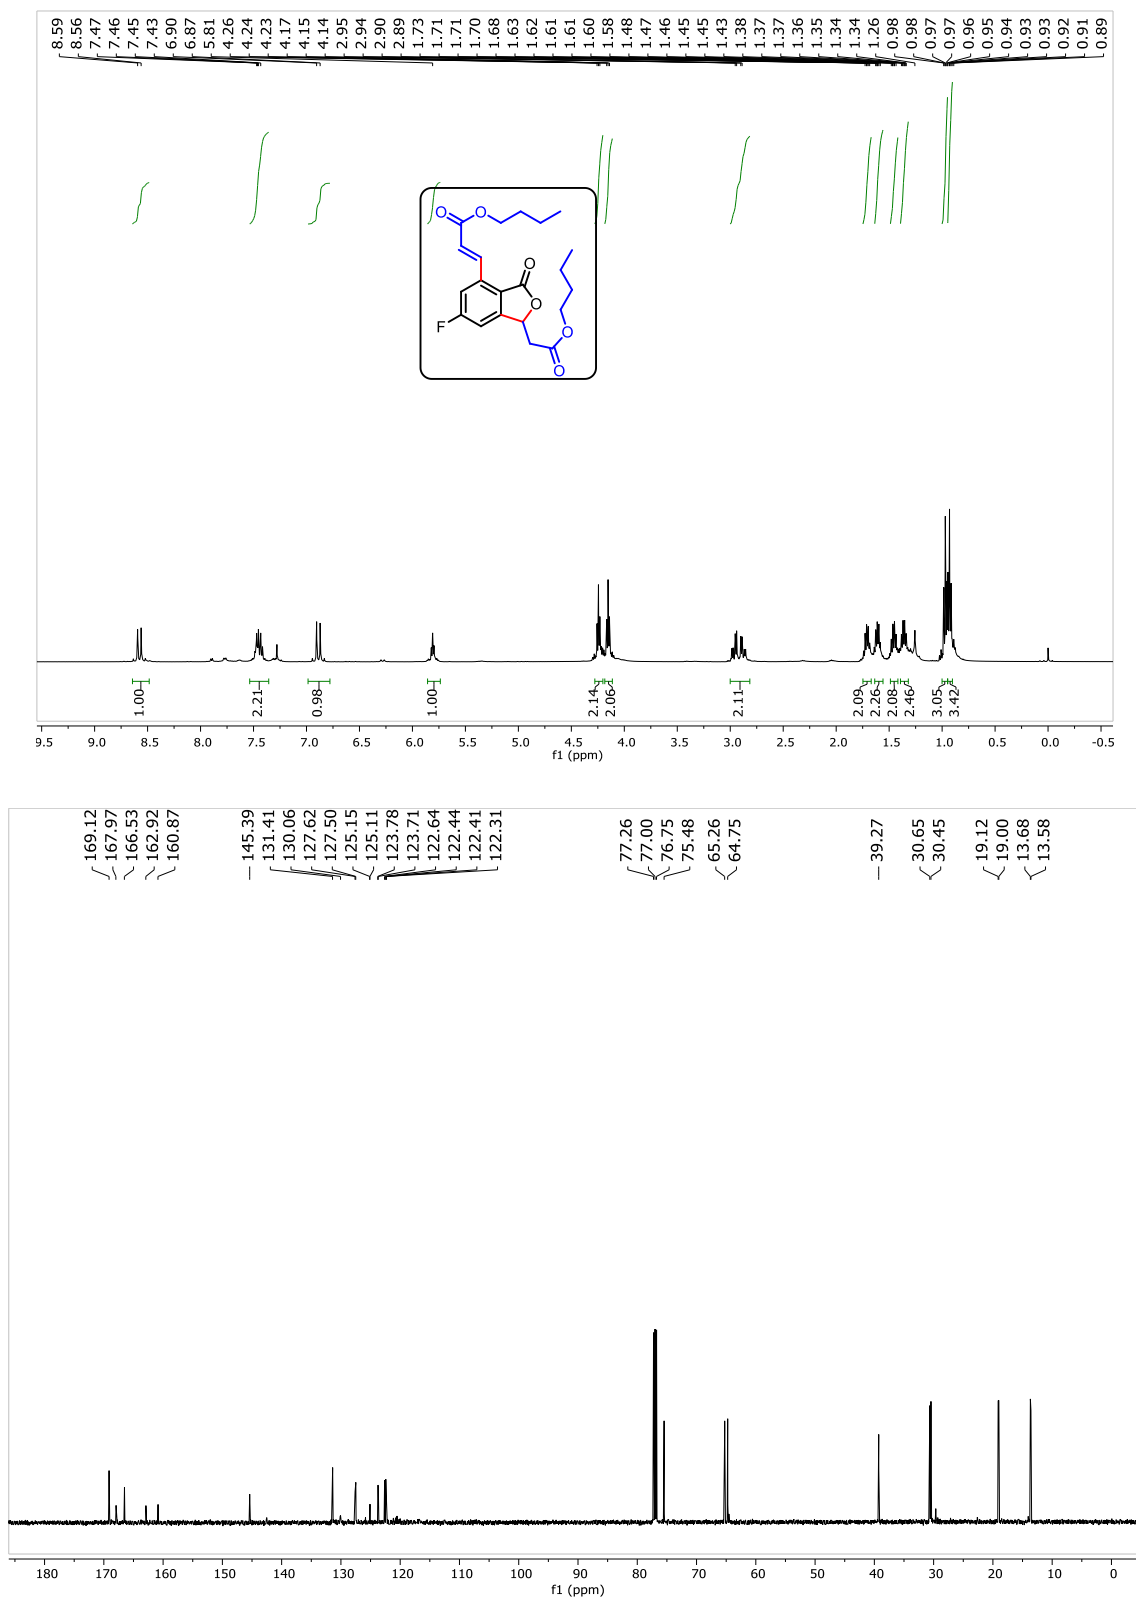

**$^1\text{H}$  and  $^{13}\text{C}$  of Compound 3fb (500 & 125 MHz,  $\text{CDCl}_3$ ):**

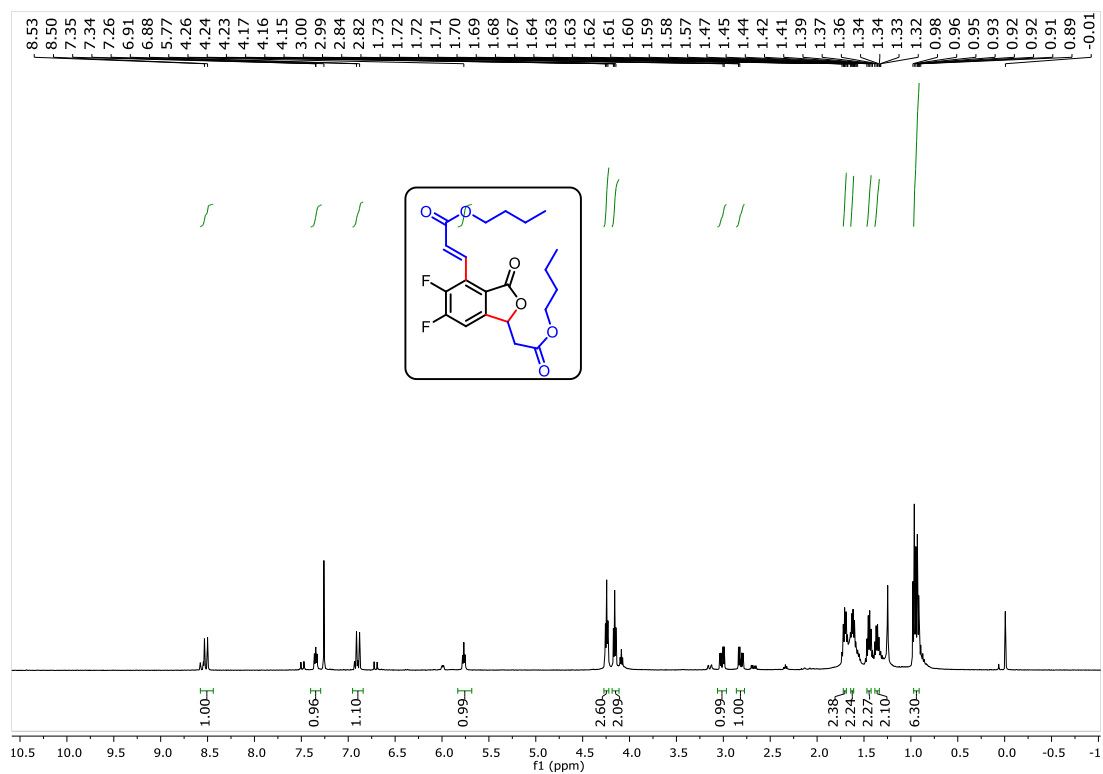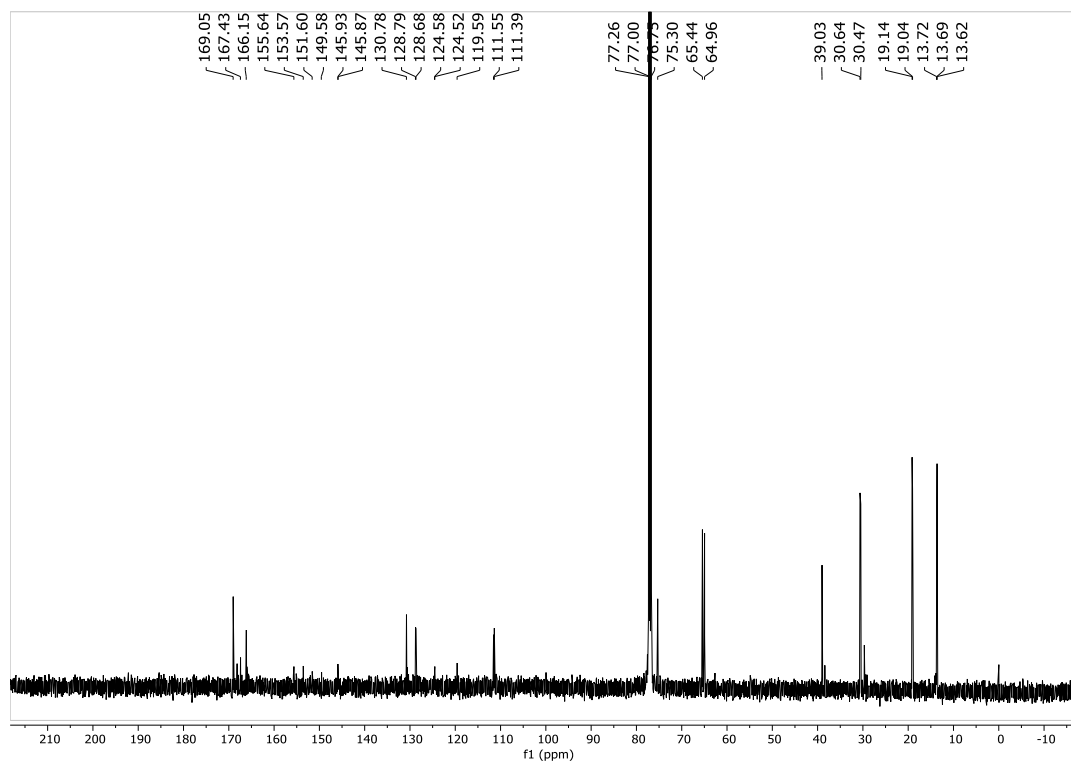

**$^1\text{H}$  and  $^{13}\text{C}$  of Compound 3gb (400 & 100 MHz,  $\text{CDCl}_3$ ):**

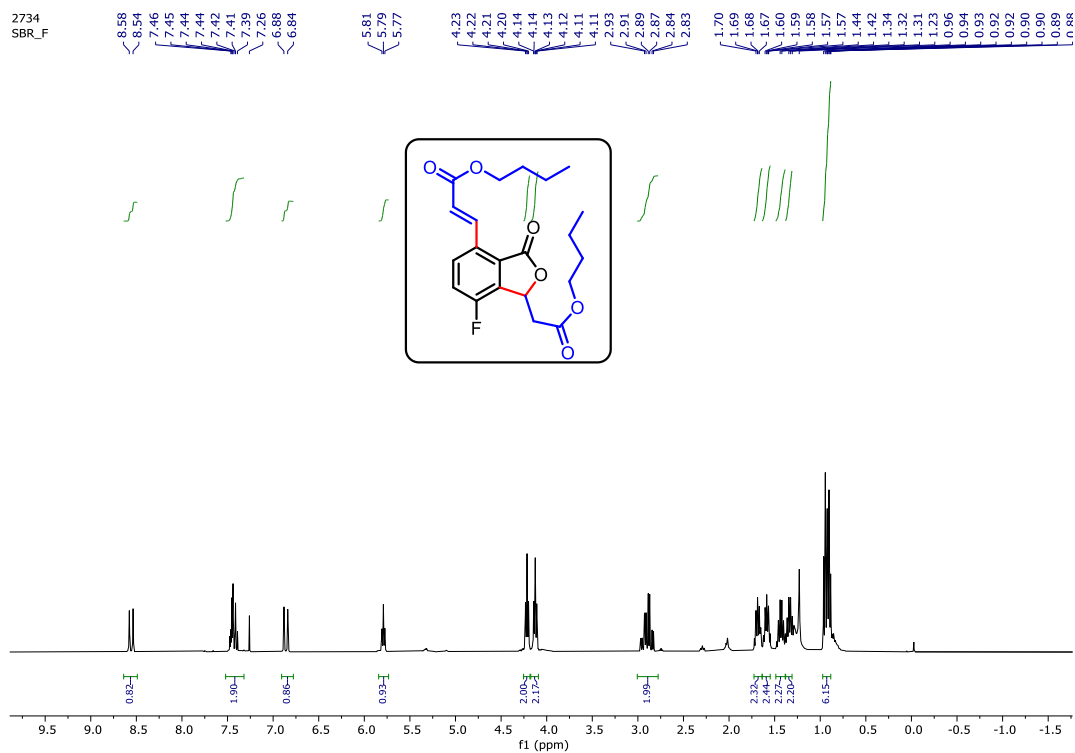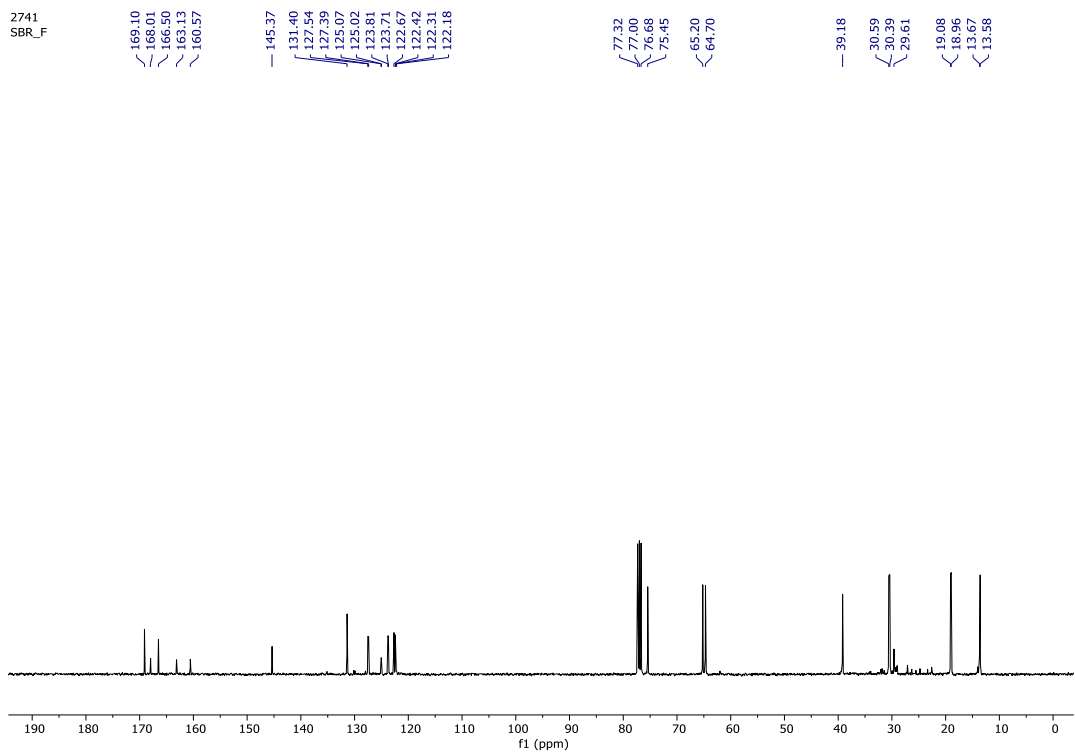

**$^1\text{H}$  and  $^{13}\text{C}$  of Compound 3ac (500 & 125 MHz,  $\text{CDCl}_3$ ):**

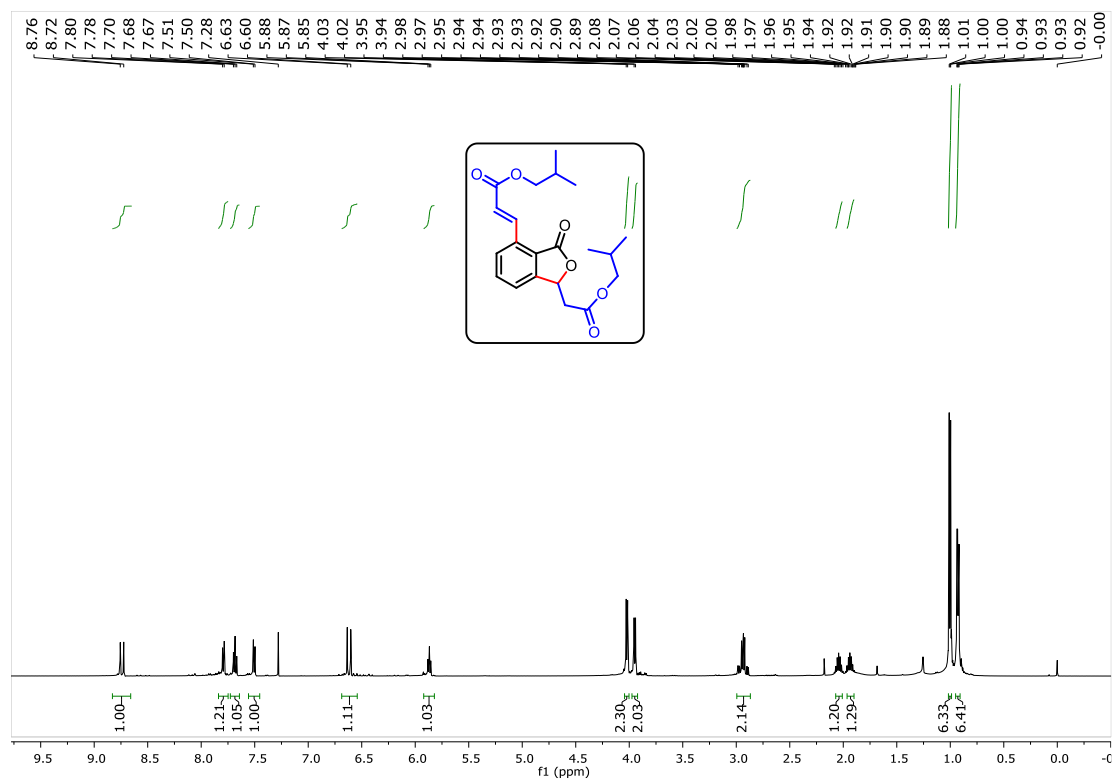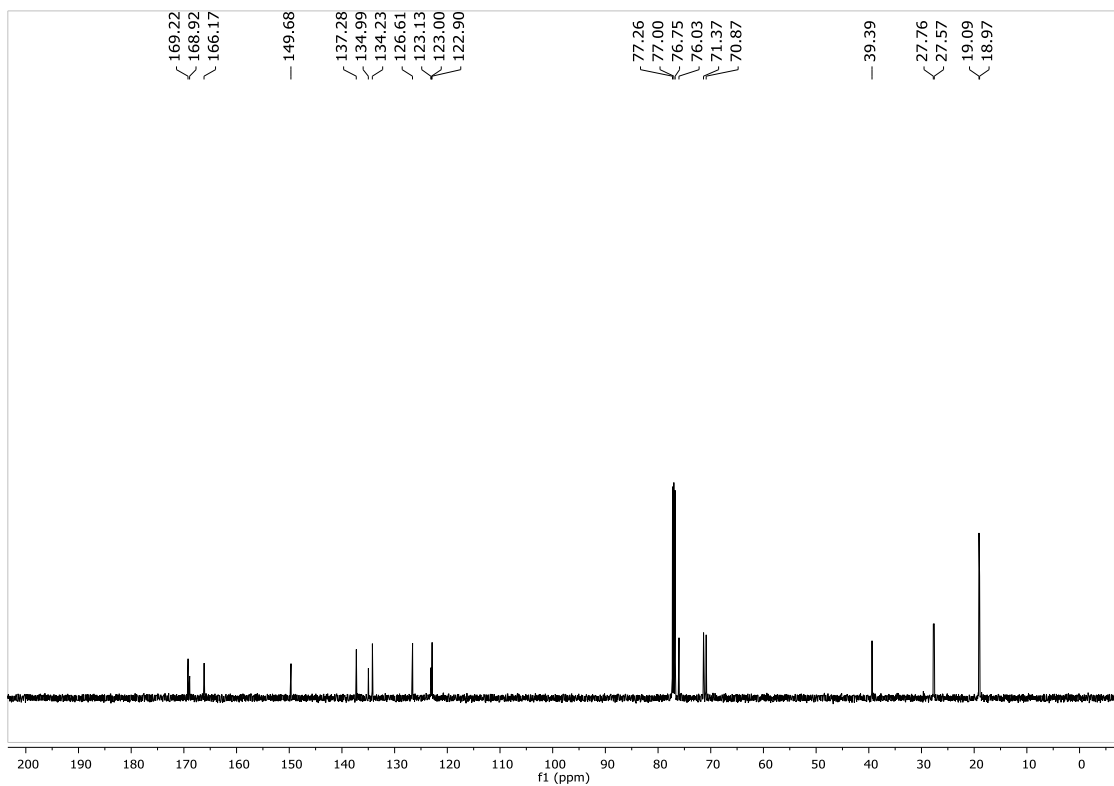

**$^1\text{H}$  and  $^{13}\text{C}$  of Compound 3bc (500 & 125 MHz,  $\text{CDCl}_3$ ):**

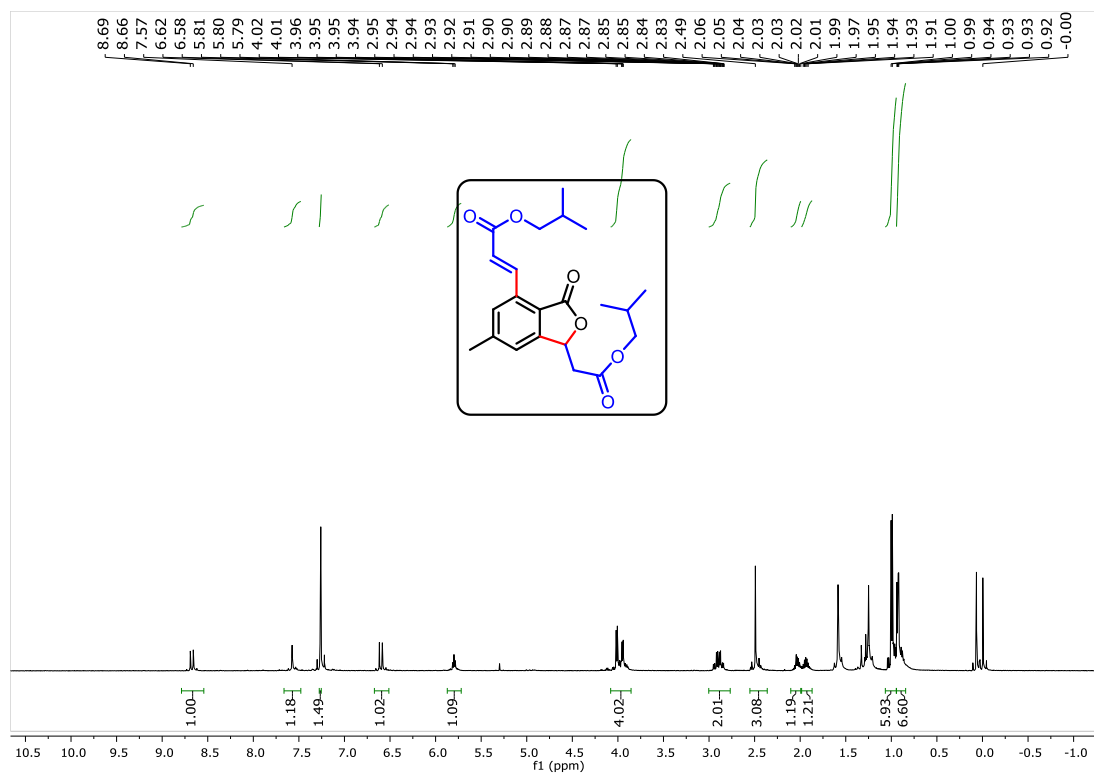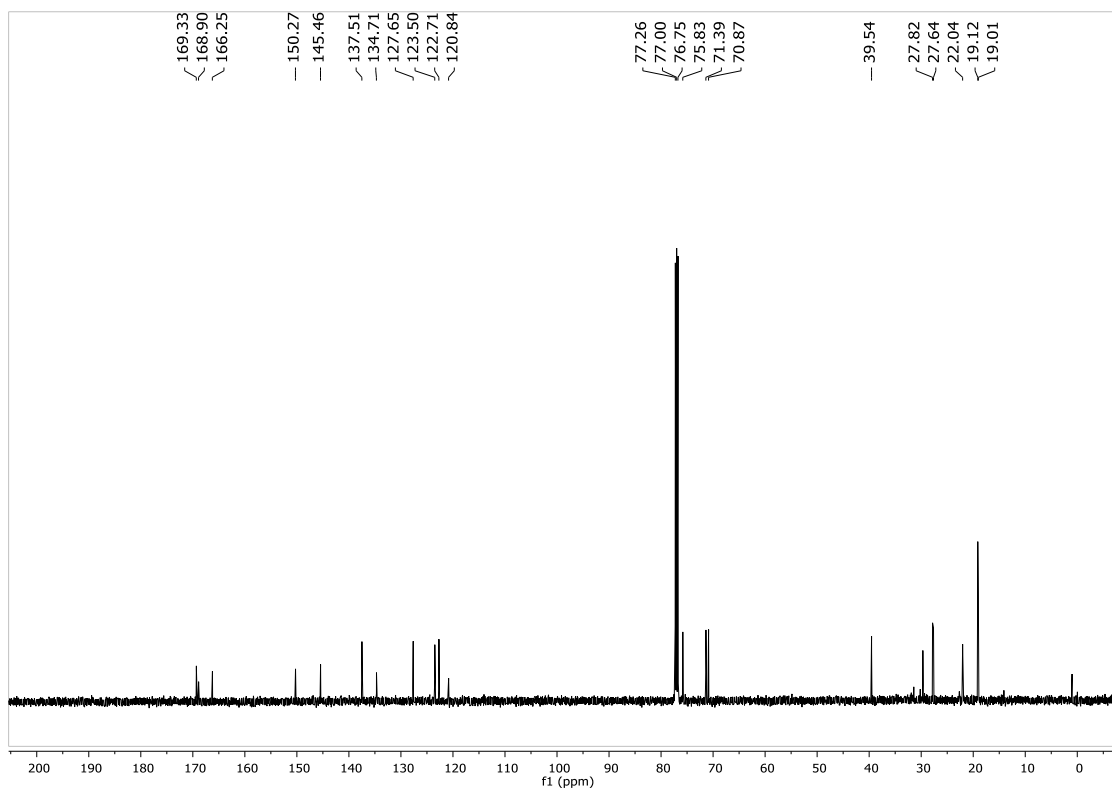

**$^1\text{H}$  and  $^{13}\text{C}$  of Compound 3gc (500 & 125 MHz,  $\text{CDCl}_3$ ):**

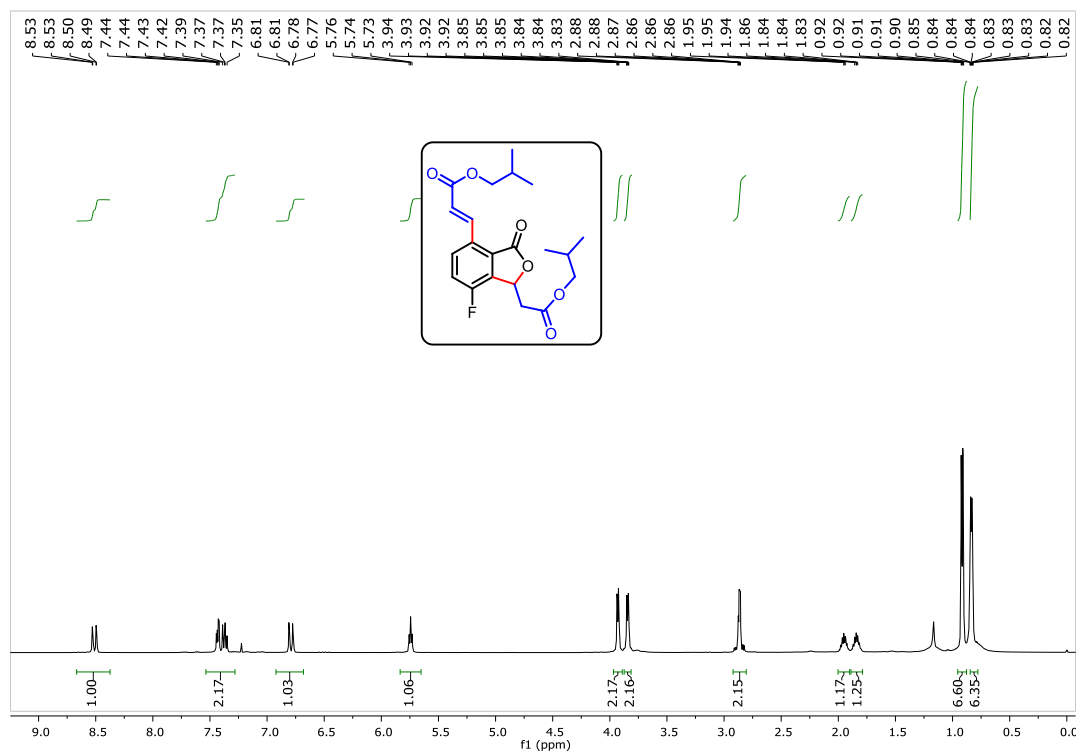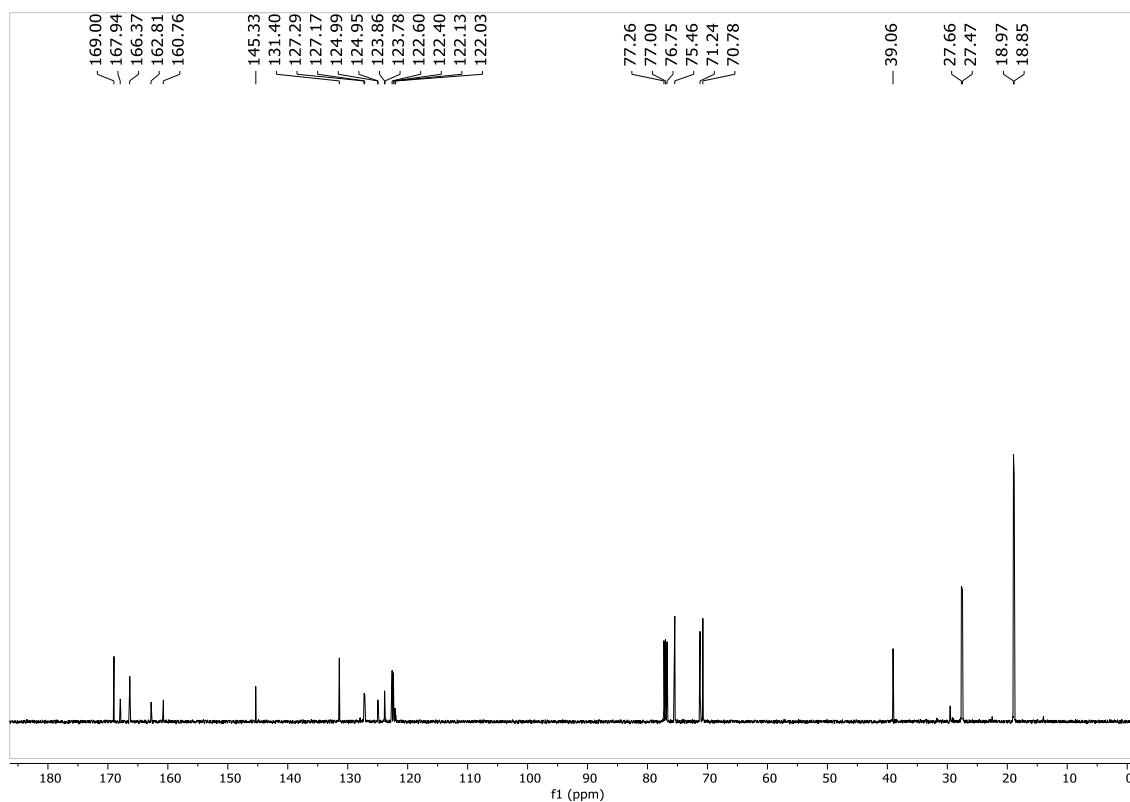

**$^1\text{H}$  and  $^{13}\text{C}$  of Compound 3ad (500 & 125 MHz,  $\text{CDCl}_3$ ):**

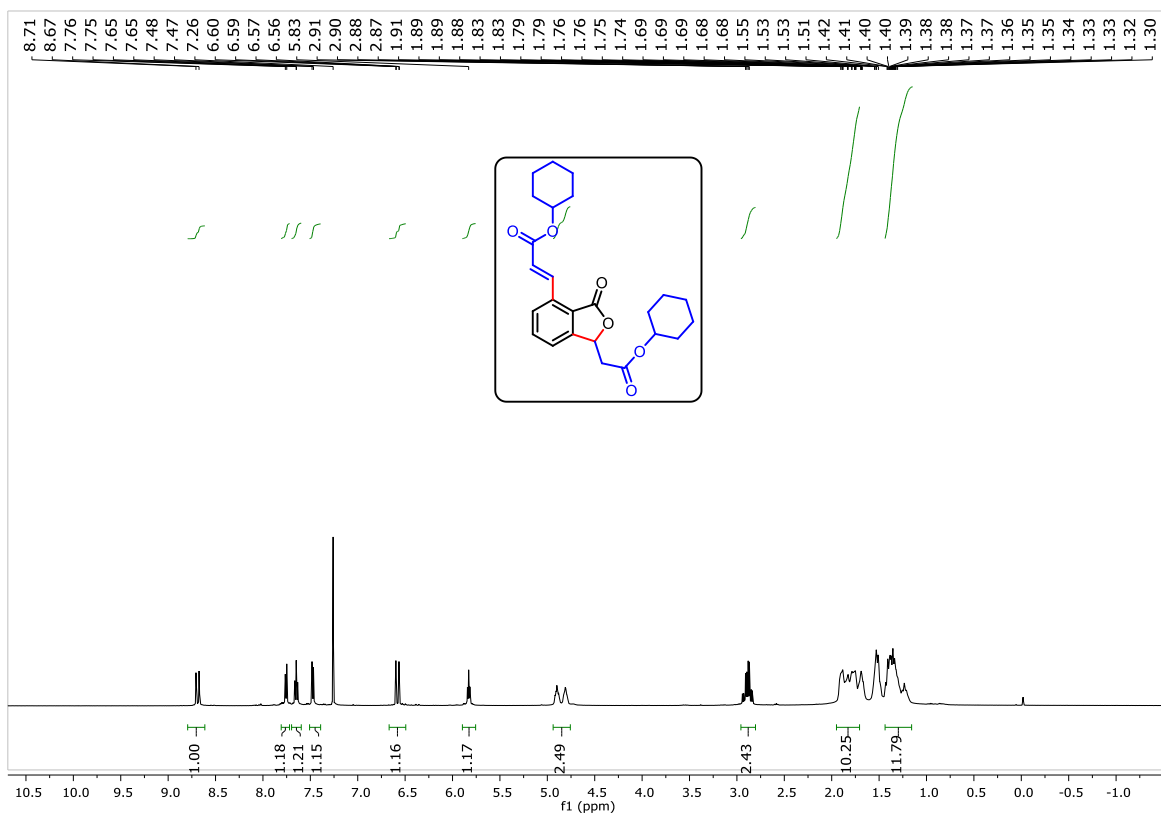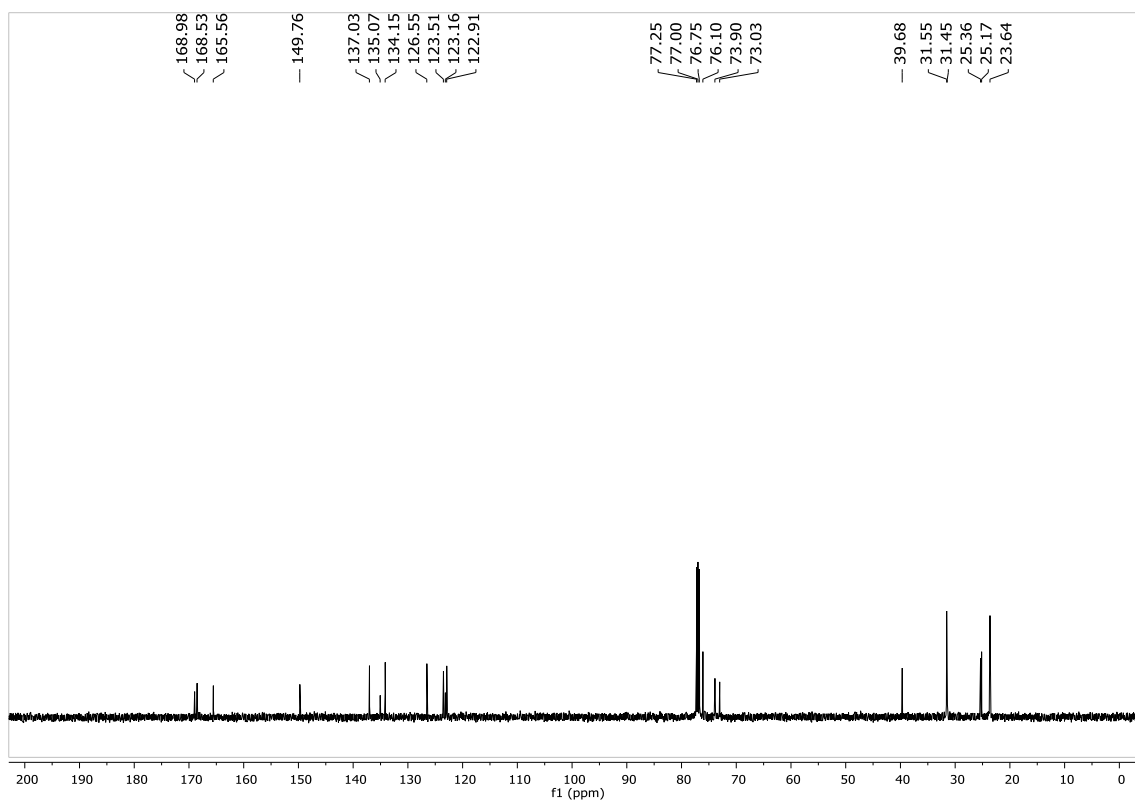



**$^1\text{H}$  and  $^{13}\text{C}$  of Compound 3bd (500 & 125 MHz,  $\text{CDCl}_3$ ):**

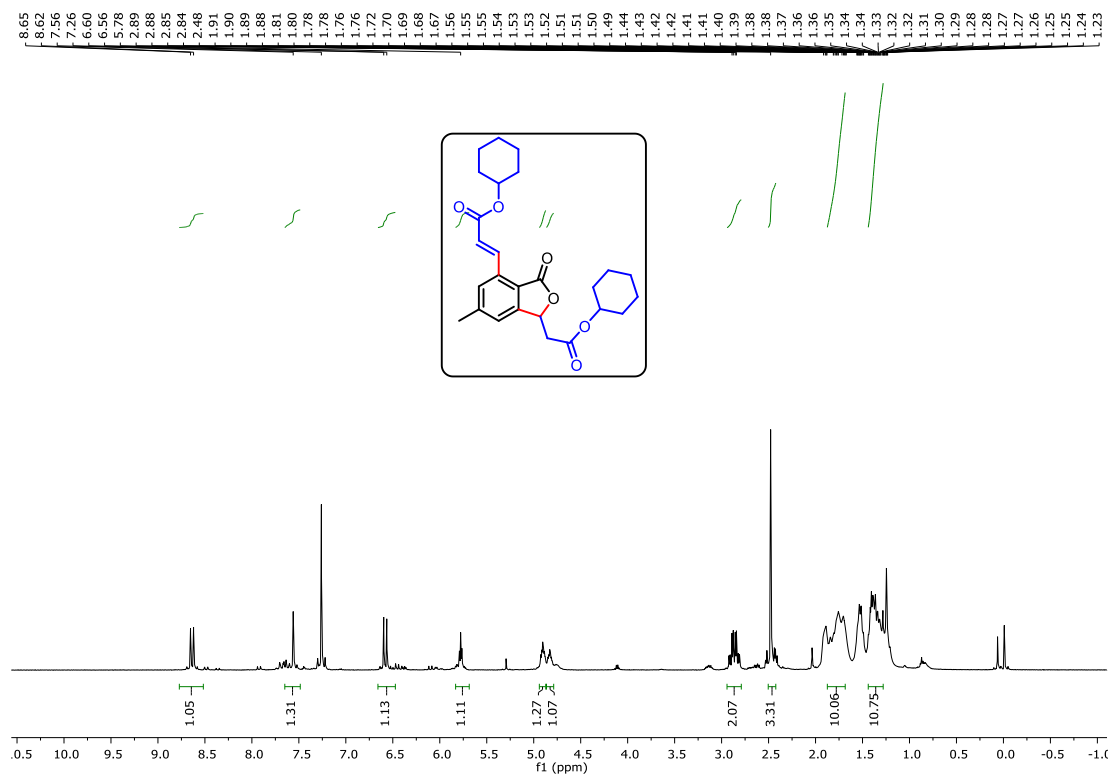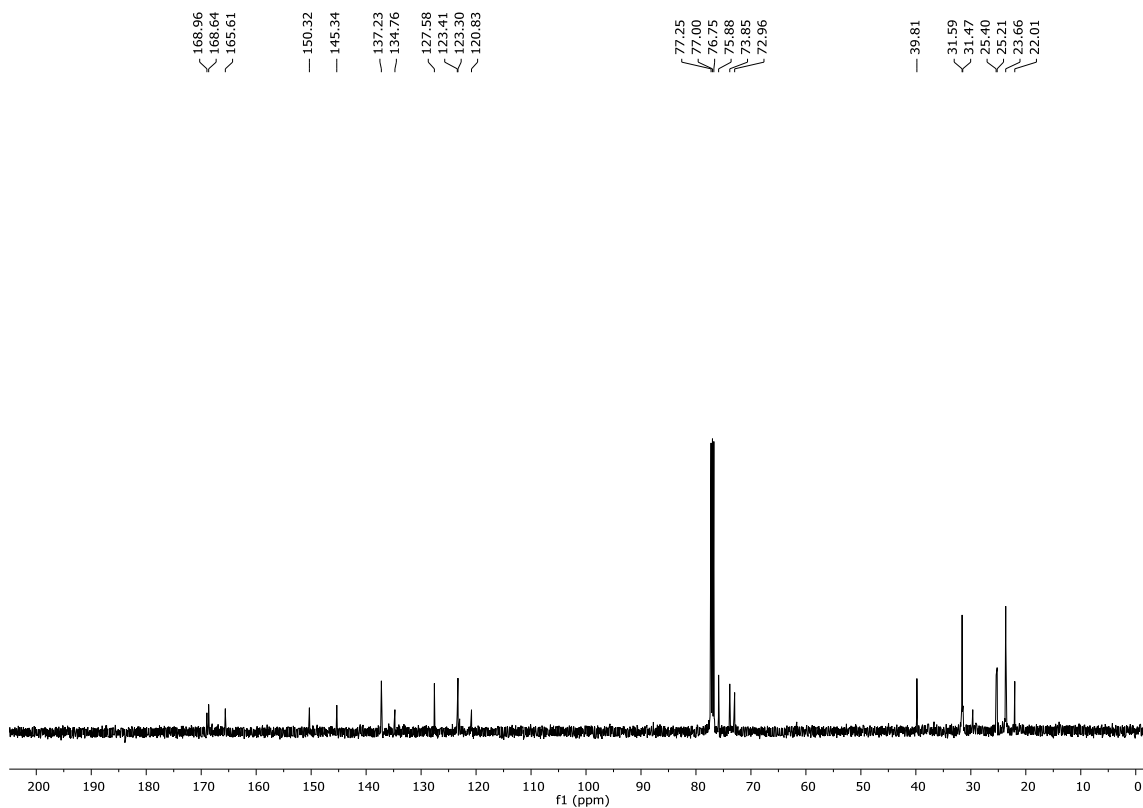

**<sup>1</sup>H and <sup>13</sup>C of Compound 3dd (500 & 125 MHz, CDCl<sub>3</sub>):**

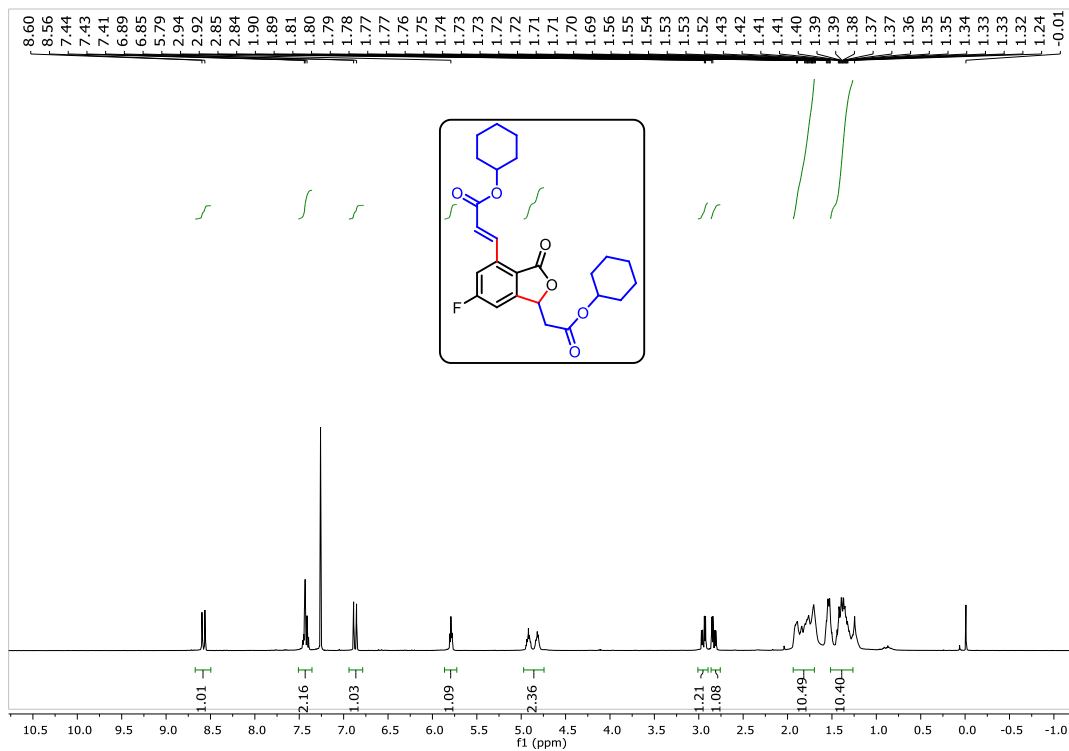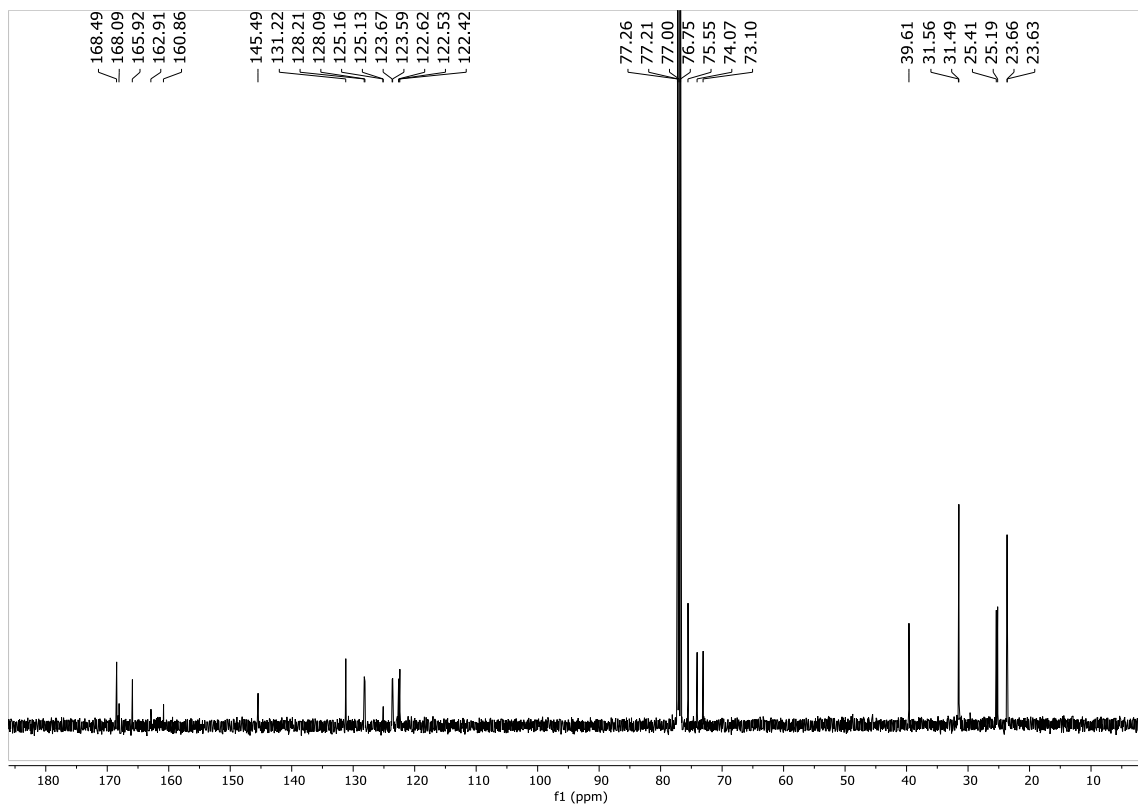

**$^1\text{H}$  and  $^{13}\text{C}$  of Compound 3ae (500 & 125 MHz,  $\text{CDCl}_3$ ):**

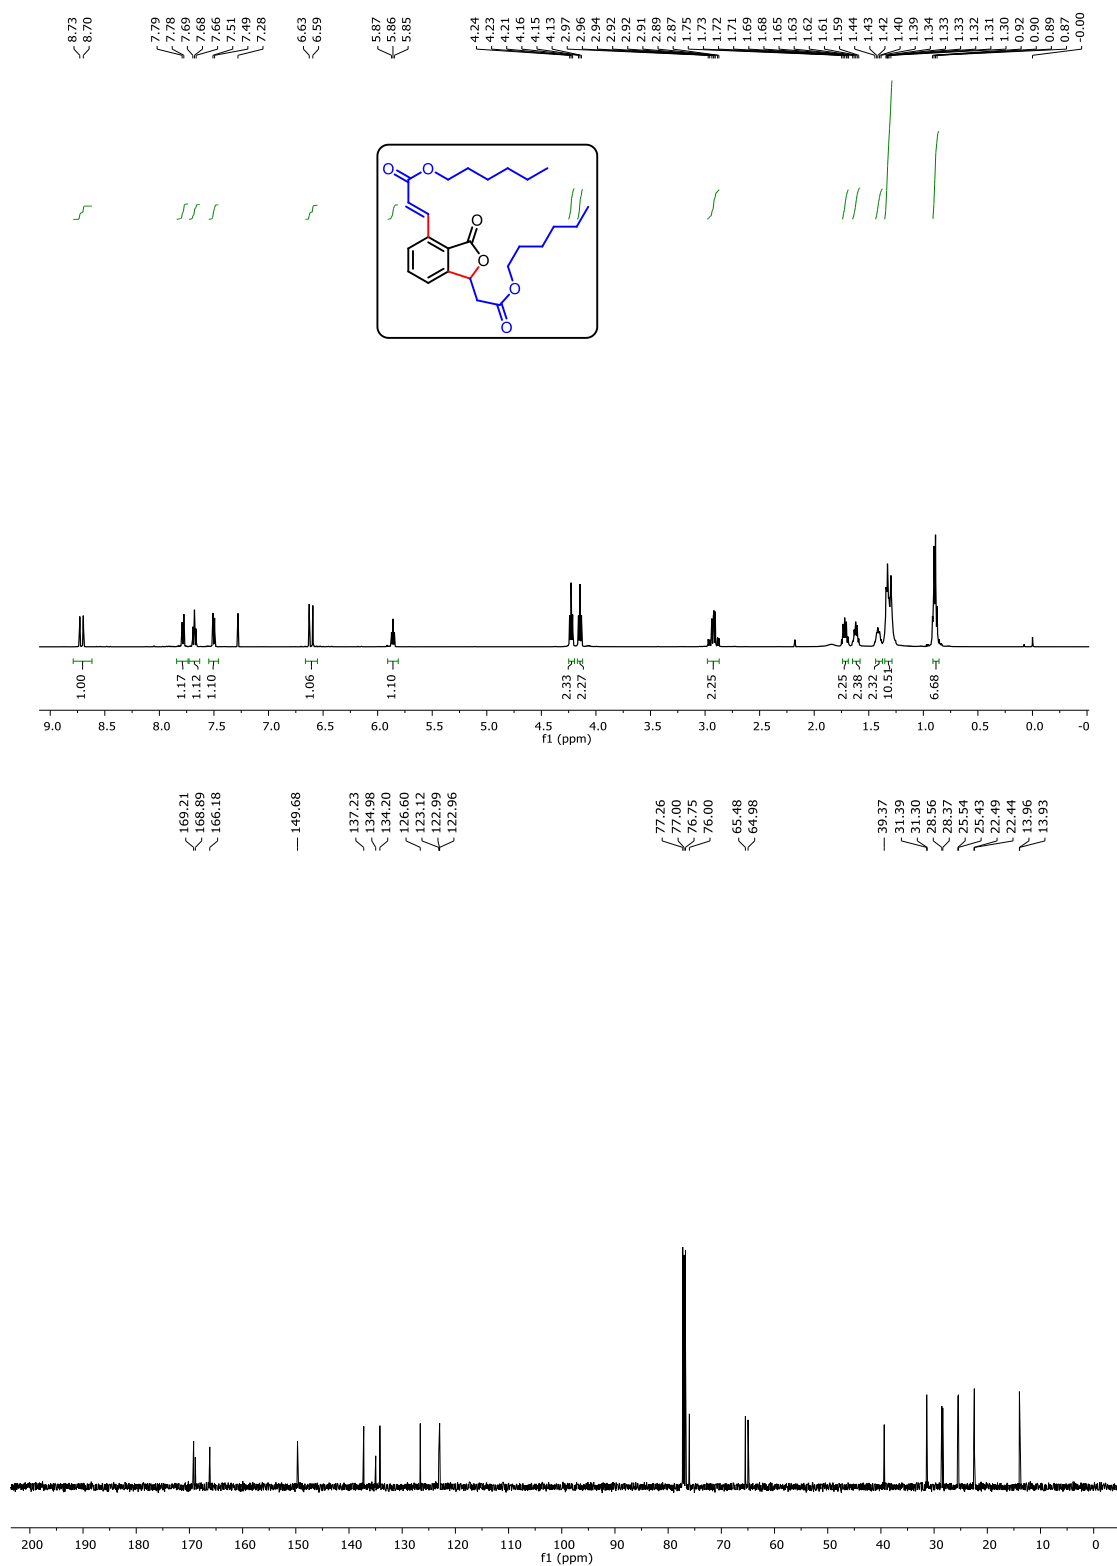

**$^1\text{H}$  and  $^{13}\text{C}$  of Compound 3af (500 & 125 MHz,  $\text{CDCl}_3$ ):**

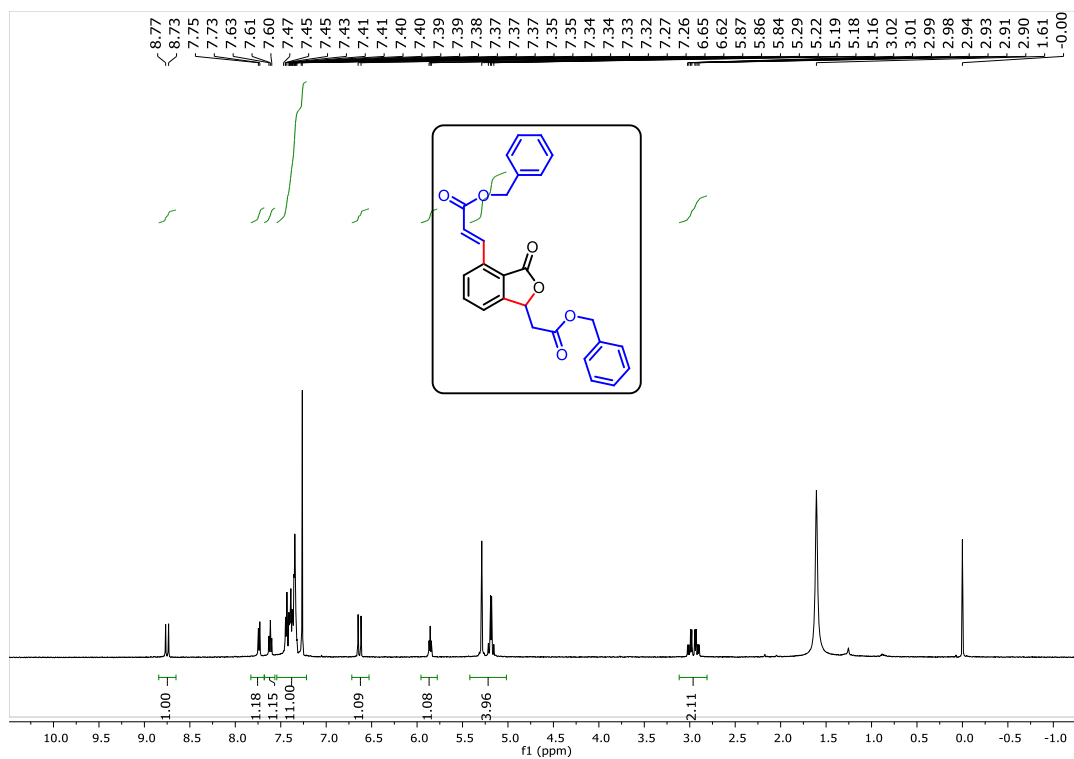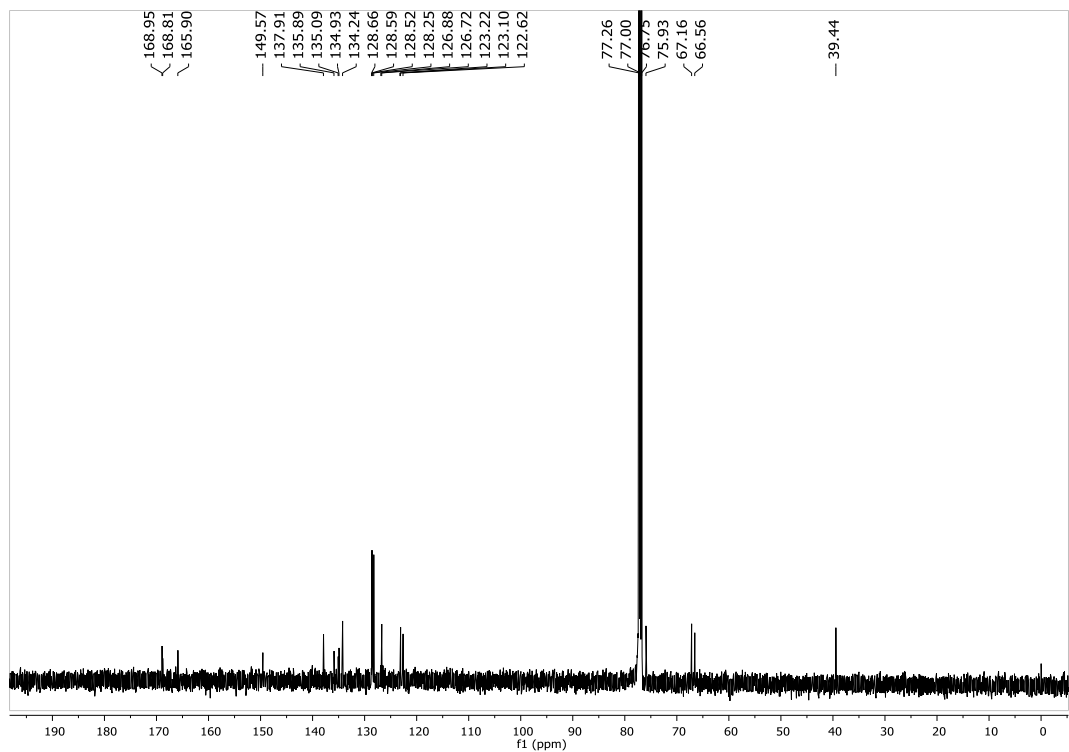

2908  
PB\_01

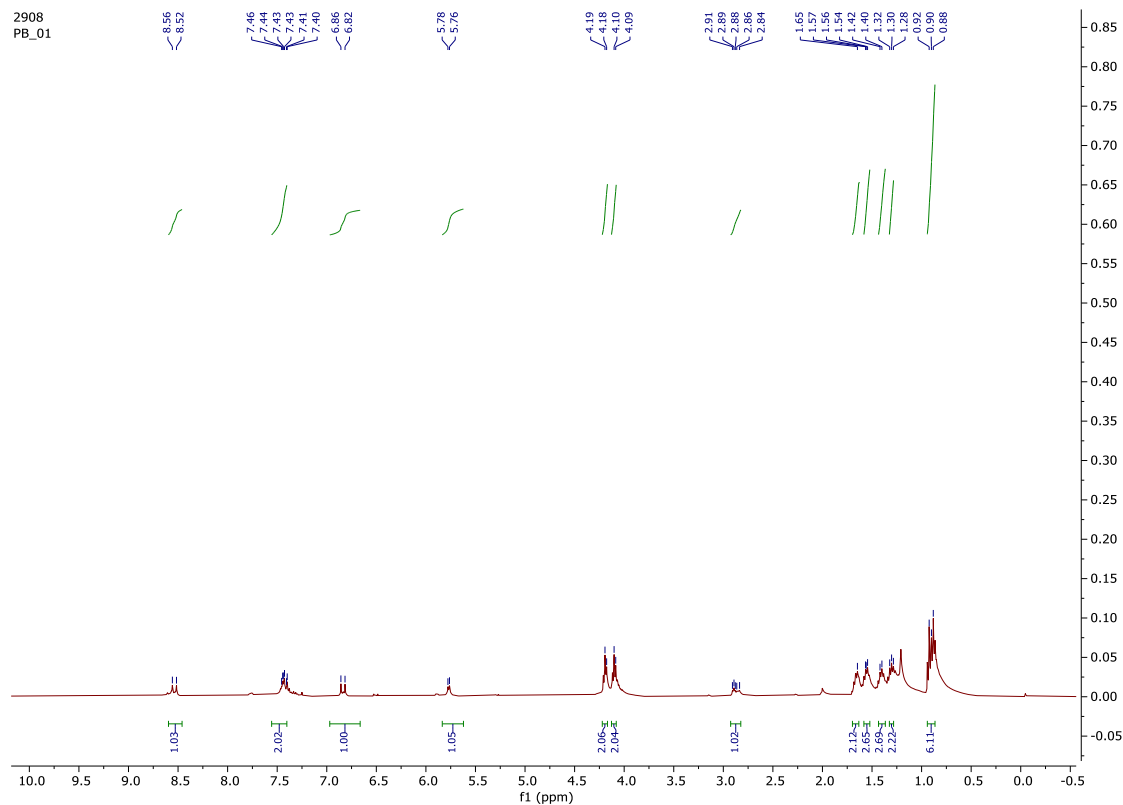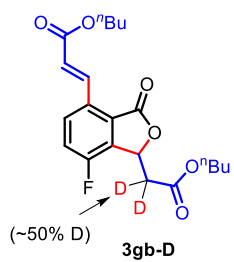

**Test for evolution of CO gas:** (Reference: *Angew. Chem. Int. Ed.* 2018, **57**,456-460)

PdCl<sub>2</sub> (100 mg) was dissolved in one drops of conc. HCl and diluted with 5 mL of distilled water. A cold saturated solution of phosphomolybdic acid in water was prepared separately. These two solutions were then mixed in a separate vial in 1:2 (PMA: PdCl<sub>2</sub>) ratio. Some narrow pieces of filter papers were then dipped in this PMA: PdCl<sub>2</sub> solution and then these were dried at room temperature for 1 hour. In a round bottom flask, phthalic anhydride (**1a**, 0.5 mmol), *tert*-butylacrylate (**2a**, 1.0 mmol), [RuCl<sub>2</sub>(*p*-cymene)]<sub>2</sub> (2.5 mol %), Cu(OAc)<sub>2</sub> (0.5 mmol) in *t*-AmOH (4.0 mL) were added. Then, one strip of the above dried filter paper was fitted inside the round bottom flask with the help of a septum as shown in the pictures below. The reaction mixture was then heated at 100 °C. After 1.5 hours of heating, it was observed that the yellow colour of the strip was changed to dark-blue colour, indicating the evolution of CO gas from the reaction mixture.

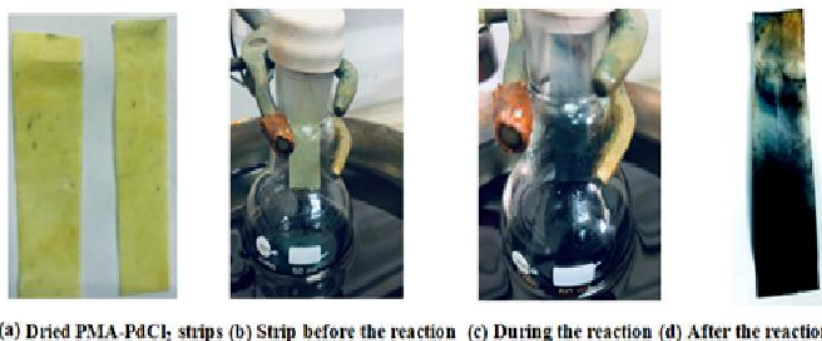

**Figure S1:** Test for evolution of CO gas from the reaction mixture
